# Supplementary material for: Single-cell dissection reveals the role of aggrephagy patterns in tumor microenvironment components aiding predicting prognosis and immunotherapy on lung adenocarcinoma
Source: publisher site journal article supplement (doi:10.18632/aging.205306), 2023-12-13
Supplement: Supplementary file [file aging-v15i23-205306-supplementary-material-SD1.pdf]

SUPPLEMENTARY FIGURES

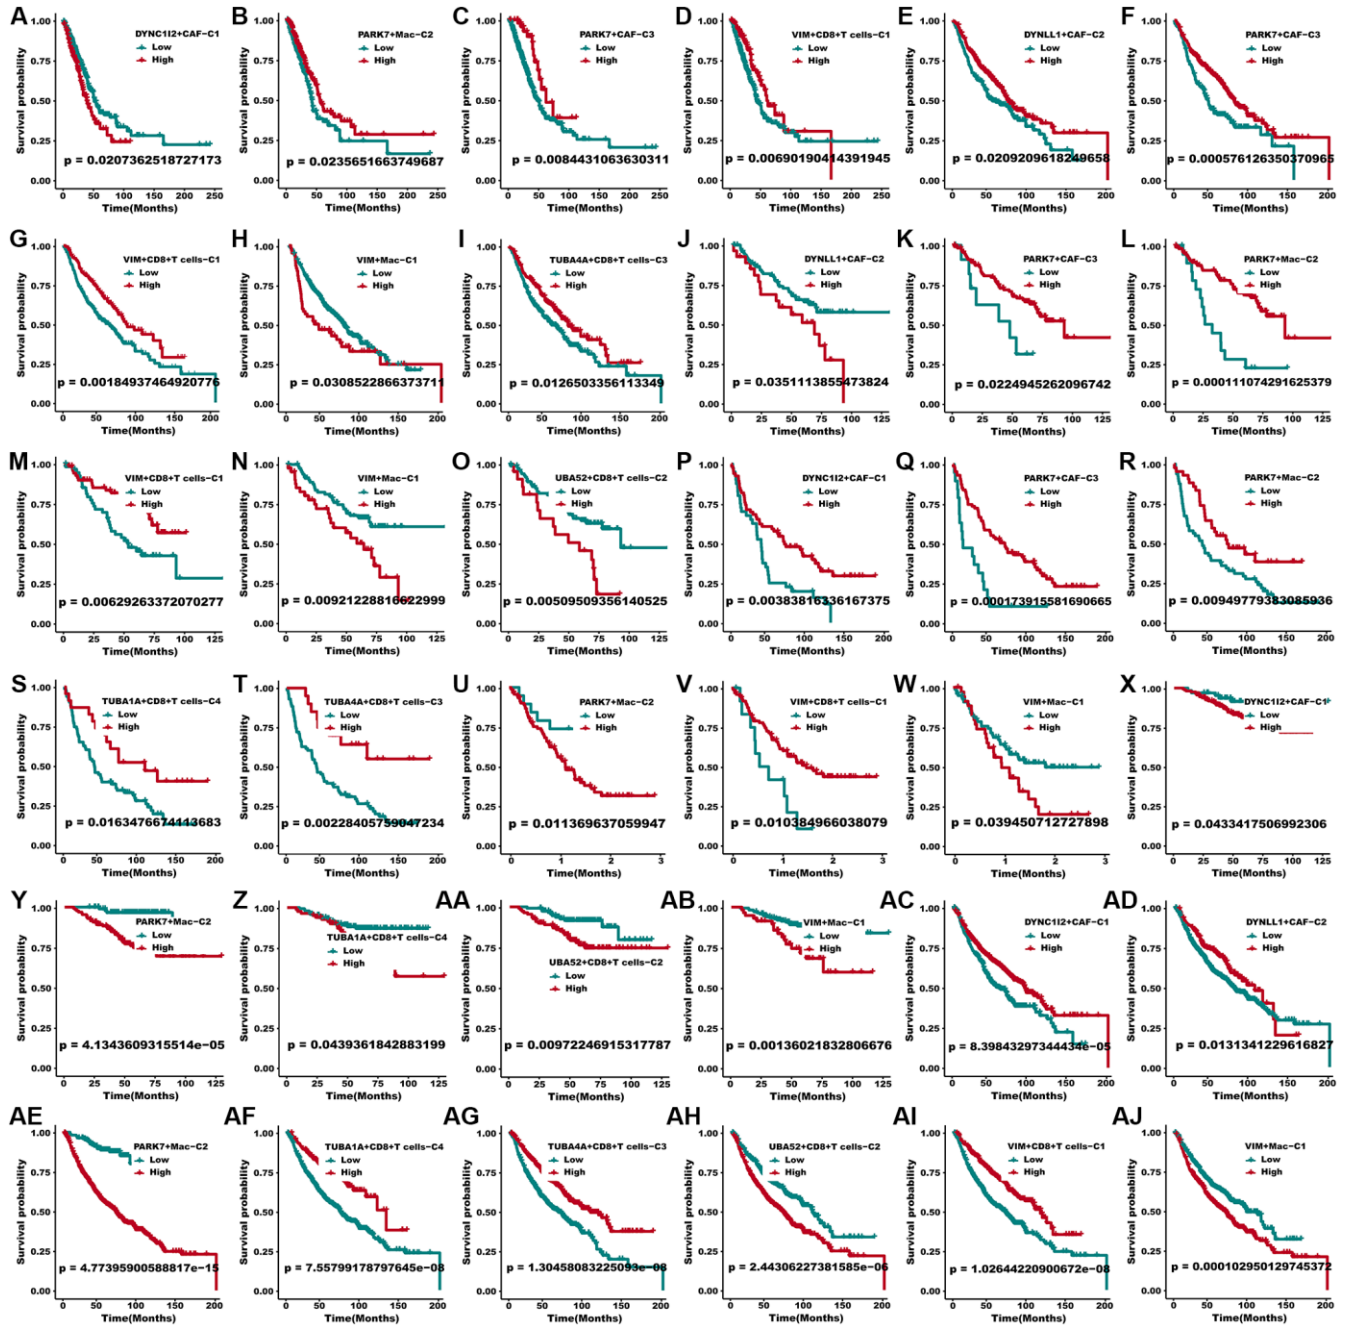

**Supplementary Figure 1. Multiple aggregophagy cell subtypes influenced the prognosis of LUAD patients.** The K-M curve analysis for aggregophagy-related cell subtypes of DYNC112+CAF (A), PARK7+Mac (B), PARK7+CAF (C), and VIM+CD8+T cell (D) in the TCGA cohort; DYNLL1+CAF (E), PARK7+CAF (F), VIM+CD8+T cell (G), VIM+Mac (H), and TUBA4A+CD8+T cell (I) in the GSE68465 cohort; DYNLL1+CAF (J), PARK7+CAF (K), PARK7+Mac (L), VIM+CD8+T cell (M), VIM+Mac (N), and UBA52+CD8+T cell (O) in the GSE50081 cohort; DYNC112+CAF (P), PARK7+CAF (Q), PARK7+Mac (R), TUBA1A+CD8+T cell (S), and TUBA4A+CD8+T cell (T) in the GSE37745 cohort; PARK7+Mac (U), VIM+CD8+T cell (V), and VIM+Mac (W) in the GSE3141 cohort; DYNC112+CAF (X), PARK7+Mac (Y), TUBA1A+CD8+T cell (Z), UBA52+CD8+T cell (AA), and VIM+Mac (AB) in the GSE31210 cohort; DYNC112+CAF (AC), DYNLL1+CAF (AD), PARK7+Mac (AE), TUBA1A+CD8+T cell (AF), TUBA4A+CD8+T cell (AG), UBA52+CD8+T cell (AH), VIM+CD8+T cell (AI), and VIM+Mac (AJ) in the metaGEO cohort.

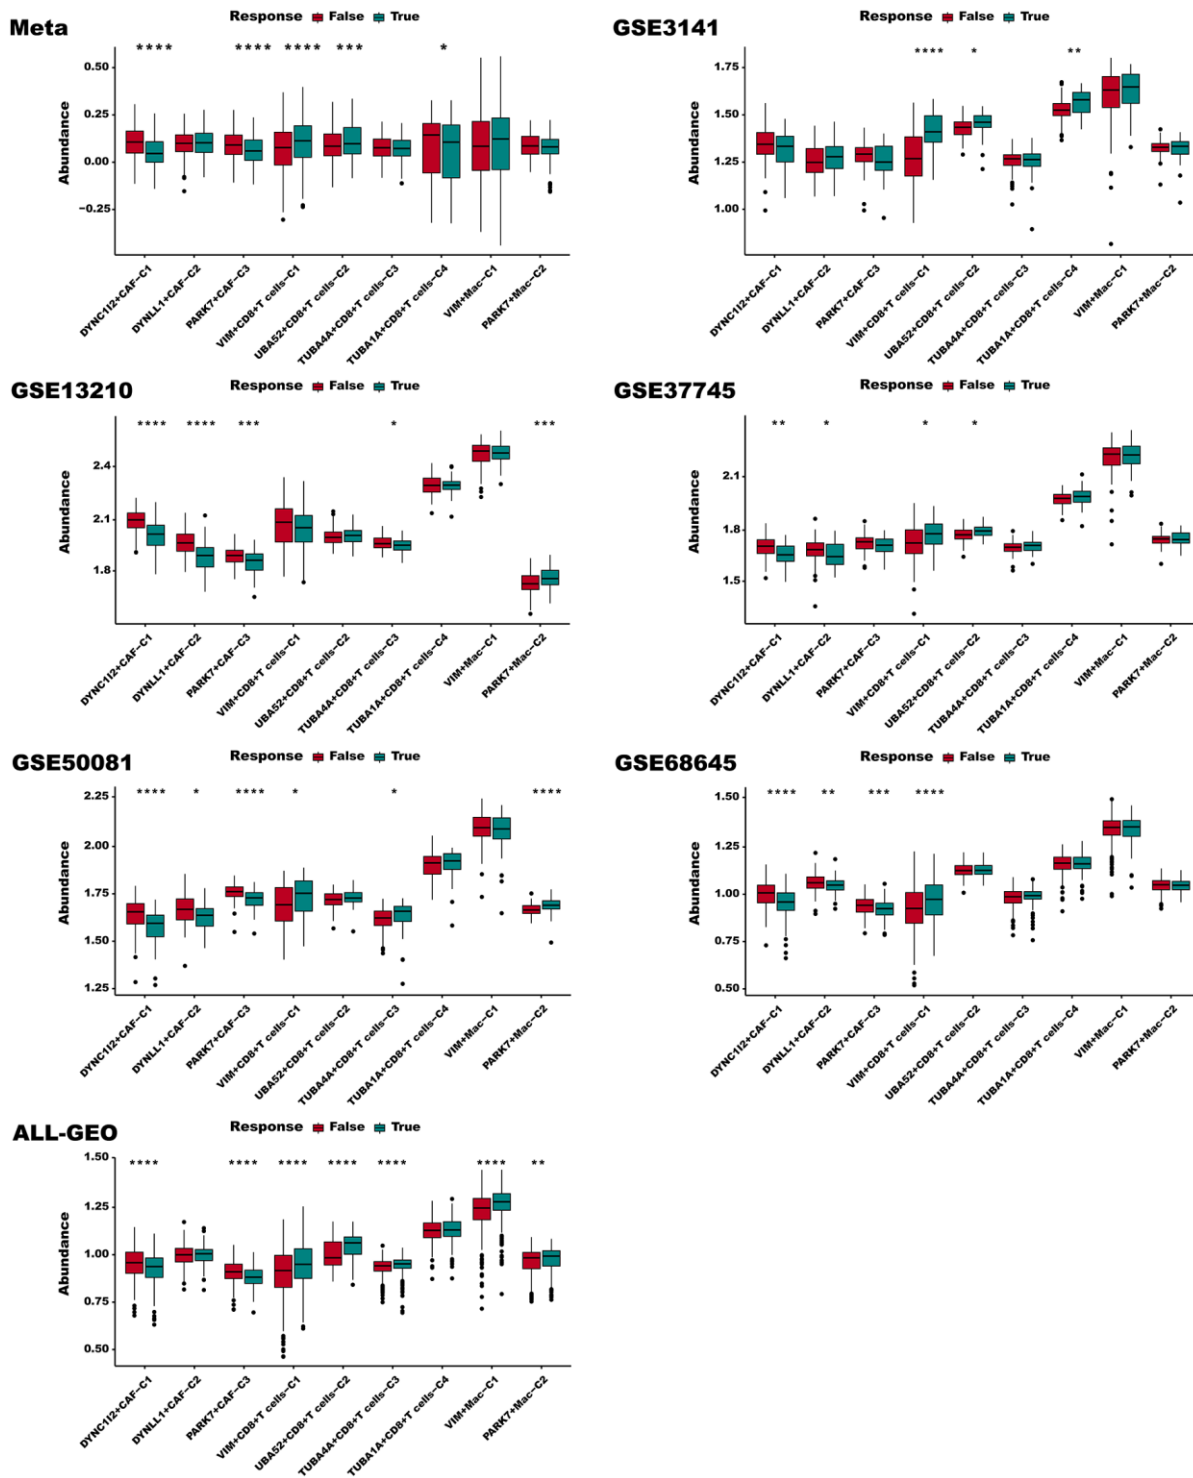

Supplementary Figure 2. Multiple aggregate phagocytosis cell subtypes predicted outcomes of immune checkpoint blockade (ICB) therapy. \* $p < 0.05$ ; \*\* $p < 0.01$ ; \*\*\* $p < 0.001$ . Abbreviation: ns: not significant.

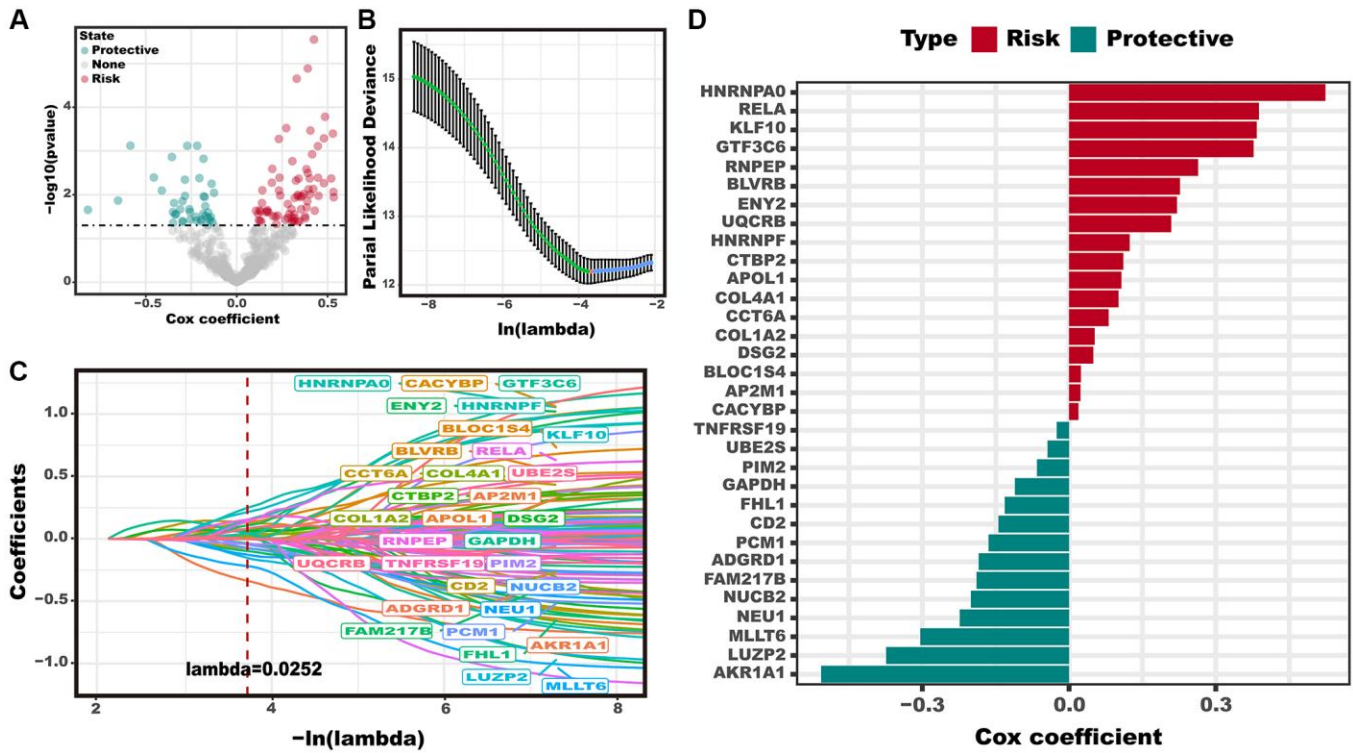

**Supplementary Figure 3. The construction of ADPS.** (A) Volcano plot of prognosis-related genes identified from univariate Cox regression analysis. (B) The trajectory of each independent variable with lambda. (C) Plots of the produced coefficient distributions for the logarithmic (lambda) series for parameter selection (lambda). (D) The multivariate Cox coefficients for each gene in the ADPS.

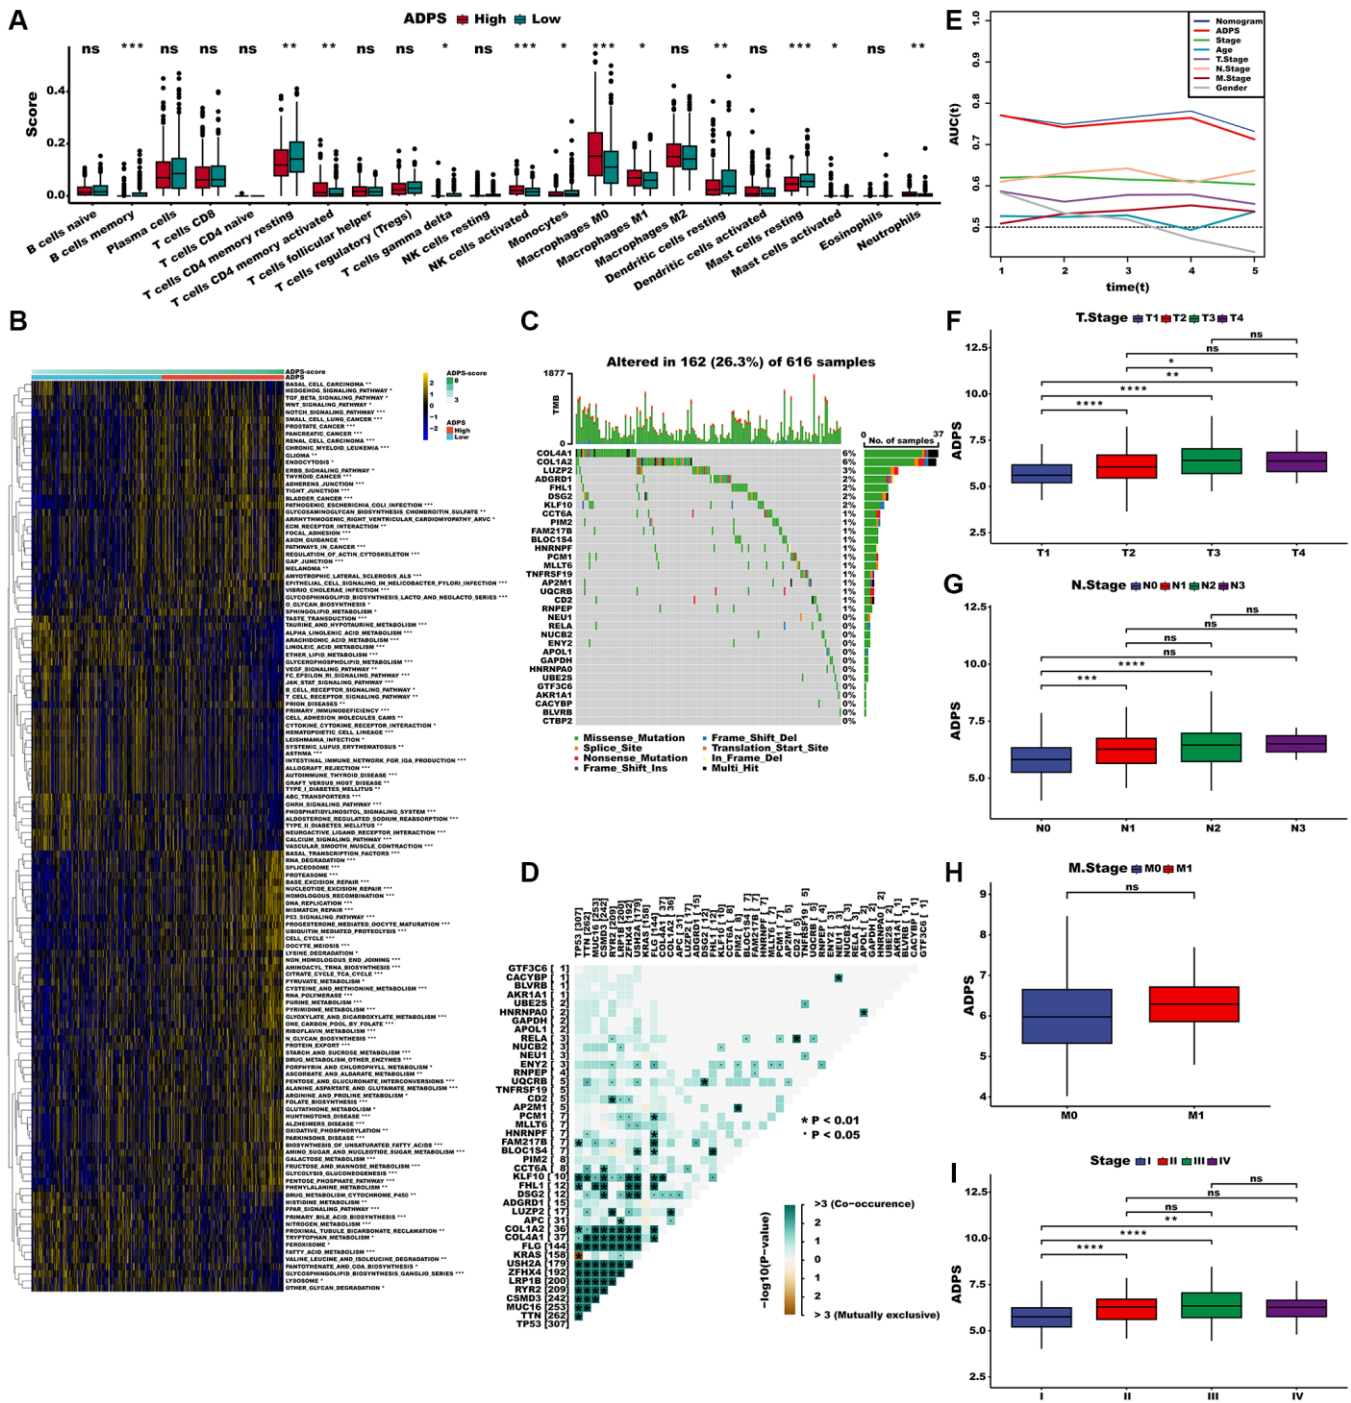

**Supplementary Figure 4. Multi-angle comprehensive analysis for ADPS.** (A) The infiltration abundances of 22 immune cells between high and low ADPS groups using CIBERSORT algorithm. (B) KEGG-based GSVA analysis delineated the biological attributes of high and low ADPS groups. (C) Waterfall diagram of SNV mutations of ADPS-related genes. (D) Collinearity and mutual exclusion analysis of ADPS-related genes and the 10 most mutated genes. (E) Comparison of predictive capacity of clinicopathological features and the nomogram using time-ROC analysis. (F–I) Correlation of clinical characteristics including T stage (F), N stage (G), M stage (H), tumor stage (I), and ADPS. \* $p < 0.05$ ; \*\* $p < 0.01$ ; \*\*\* $p < 0.001$ . Abbreviation: ns: not significant.
