# Supplementary material for: Single-cell dissection reveals the role of aggrephagy patterns in tumor microenvironment components aiding predicting prognosis and immunotherapy on lung adenocarcinoma
Source: Aging (Albany NY). 2023 Dec 13;15(23):14333–71. doi: 10.18632/aging.205306 (PMC10756128; doi:10.18632/aging.205306)
Supplement: Supplementary Tables 1, 2, 4, 5 and 8 [file aging-15-205306-s002.xlsx]

## Sheet: Supplementary Table 1
Supplementary Table 1. Details of data sources.
Accession number	Platform	Number of patients	Survival information	Treatment information	Use	Source or Database	Data Type	Dataset URL
GSE149655	GPL24676 (Single cell data)	4			Discovery	Gene Expression Omnibus	Transcriptome	https://www.ncbi.nlm.nih.gov/geo/
TCGA-LUAD	Htseq	500	Yes	No	Discovery	The Cancer Genome Atlas	Transcriptome	https://portal.gdc.cancer.gov/
GSE3141	GPL570	111	Yes	No	Validation	Gene Expression Omnibus	Transcriptome	https://www.ncbi.nlm.nih.gov/geo/
GSE31210	GPL570	226	Yes	No	Validation	Gene Expression Omnibus	Transcriptome	https://www.ncbi.nlm.nih.gov/geo/
GSE37745	GPL570	106	Yes	No	Validation	Gene Expression Omnibus	Transcriptome	https://www.ncbi.nlm.nih.gov/geo/
GSE50081	GPL570	127	Yes	No	Validation	Gene Expression Omnibus	Transcriptome	https://www.ncbi.nlm.nih.gov/geo/
GSE68465	GPL96	442	Yes	No	Validation	Gene Expression Omnibus	Transcriptome	https://www.ncbi.nlm.nih.gov/geo/
IMvigor210	Htseq	298	Yes	Yes|Immutherapy	Exploration	Mariathasan et al.	Transcriptome	https://doi.org/10.1038/nature25501
GSE78220	GPL11154	28	Yes	Yes|Immutherapy	Exploration	Gene Expression Omnibus	Transcriptome	https://www.ncbi.nlm.nih.gov/geo/
SKCM	PMID: 31055200	47	No	Yes|Immutherapy	Exploration	Lu et al.	Transcriptome	https://pubmed.ncbi.nlm.nih.gov/31055200/
GTEx-LUNG	Htseq	288	No	No	Discovery	The Genotype-Tissue Expression	Transcriptome	https://www.gtexportal.org/
TCGA-LUAD	CNV				Exploration	The Cancer Genome Atlas	Multi-omics	https://portal.gdc.cancer.gov/
TCGA-LUAD	CNA				Exploration	The Cancer Genome Atlas	Multi-omics	https://portal.gdc.cancer.gov/
TCGA-LUAD	Methylation				Exploration	The Cancer Genome Atlas	Multi-omics	https://portal.gdc.cancer.gov/
CMAP	https://clue.io/			Yes	Exploration	Connectivity Map	Drug Sensitivity	https://clue.io/
CTRP	https://portals.broadinstitute.org/ctrp/			Yes	Exploration	Cancer Therapeutics Response Portal	Drug Sensitivity	https://portals.broadinstitute.org/ctrp/
PRISM	https://www.theprismlab.org/			Yes	Exploration	Profiling Relative Inhibition Simultaneously in Mixtures	Drug Sensitivity	https://www.theprismlab.org/
CCLE	https://portals.broadinstitute.org/ccle/			Yes	Exploration	Cancer Cell Line Encyclopedia	Drug Sensitivity	https://portals.broadinstitute.org/ccle/

## Sheet: Supplementary Table 2
Supplementary Table 2. Feature genes of each NMF cluster in CAFs.
	p_val	avg_log2FC	pct.1	pct.2	cluster	gene	Name/Cell type
IGKC	0.00132097	0.818998	0.732	0.736	0	IGKC	Non-Aggre-CAF-C4
LYZ	0.0046548	1.09604	0.659	0.684	0	LYZ	Non-Aggre-CAF-C4
HLA-DRA	0.00491736	0.722677	0.756	0.822	0	HLA-DRA	Non-Aggre-CAF-C4
FXR1	0.00516151	0.663479	0.171	0.391	0	FXR1	Non-Aggre-CAF-C4
IGHA1	0.00527996	1.02225	0.732	0.776	0	IGHA1	Non-Aggre-CAF-C4
IGLC3	0.00581216	1.4982	0.512	0.443	0	IGLC3	Non-Aggre-CAF-C4
CRTC3	0.00720107	0.593321	0.073	0.224	0	CRTC3	Non-Aggre-CAF-C4
TMED7	0.00911082	0.563634	0.146	0.339	0	TMED7	Non-Aggre-CAF-C4
ARPC4	0.00956527	0.556789	0.207	0.448	0	ARPC4	Non-Aggre-CAF-C4
DYNC1I2	4.90558e-19	1.39595	0.893	0.315	1	DYNC1I2	DYNC1I2+CAF-C1
TUBA1A	1.12435e-12	1.10935	0.92	0.552	1	TUBA1A	DYNC1I2+CAF-C1
SPSB1	7.49221e-09	0.564599	0.493	0.138	1	SPSB1	DYNC1I2+CAF-C1
ASPN	4.52424e-08	1.12419	0.693	0.343	1	ASPN	DYNC1I2+CAF-C1
SYNCRIP	1.24577e-07	0.708295	0.52	0.188	1	SYNCRIP	DYNC1I2+CAF-C1
RCN2	1.86746e-07	0.552055	0.653	0.282	1	RCN2	DYNC1I2+CAF-C1
JTB	2.24469e-07	0.598304	0.72	0.331	1	JTB	DYNC1I2+CAF-C1
DEGS1	2.41291e-07	0.751727	0.587	0.243	1	DEGS1	DYNC1I2+CAF-C1
VCP	2.56518e-07	0.528928	0.627	0.287	1	VCP	DYNC1I2+CAF-C1
MAP4K5	3.85938e-07	0.500134	0.36	0.094	1	MAP4K5	DYNC1I2+CAF-C1
GEM	3.93955e-07	0.713028	0.693	0.337	1	GEM	DYNC1I2+CAF-C1
CNN3	4.01815e-07	0.682439	0.867	0.508	1	CNN3	DYNC1I2+CAF-C1
COL4A2	5.18835e-07	0.712022	0.587	0.265	1	COL4A2	DYNC1I2+CAF-C1
LUZP2	6.15275e-07	0.759206	0.333	0.083	1	LUZP2	DYNC1I2+CAF-C1
COL4A1	7.42545e-07	0.768568	0.6	0.298	1	COL4A1	DYNC1I2+CAF-C1
COL3A1	9.75794e-07	1.00789	0.92	0.586	1	COL3A1	DYNC1I2+CAF-C1
SERPINE1	1.02798e-06	1.24435	0.52	0.204	1	SERPINE1	DYNC1I2+CAF-C1
COL8A1	1.24494e-06	0.815907	0.72	0.381	1	COL8A1	DYNC1I2+CAF-C1
MLEC	1.37968e-06	0.613294	0.52	0.215	1	MLEC	DYNC1I2+CAF-C1
LTBP1	1.46996e-06	0.6759	0.707	0.381	1	LTBP1	DYNC1I2+CAF-C1
COL5A1	1.57705e-06	0.758576	0.573	0.238	1	COL5A1	DYNC1I2+CAF-C1
GOLGA2	1.702e-06	0.58748	0.507	0.204	1	GOLGA2	DYNC1I2+CAF-C1
HDAC2	1.76928e-06	0.634141	0.453	0.171	1	HDAC2	DYNC1I2+CAF-C1
TPM4	1.87285e-06	0.558512	0.907	0.58	1	TPM4	DYNC1I2+CAF-C1
IPO7	1.91342e-06	0.518298	0.4	0.133	1	IPO7	DYNC1I2+CAF-C1
FKBP9	1.95757e-06	0.67565	0.48	0.182	1	FKBP9	DYNC1I2+CAF-C1
MAGED2	2.08066e-06	0.516028	0.707	0.354	1	MAGED2	DYNC1I2+CAF-C1
EPHA3	2.23139e-06	0.614113	0.373	0.122	1	EPHA3	DYNC1I2+CAF-C1
NOTCH3	2.7923e-06	0.590364	0.32	0.088	1	NOTCH3	DYNC1I2+CAF-C1
CTHRC1	2.98462e-06	0.924487	0.667	0.359	1	CTHRC1	DYNC1I2+CAF-C1
TUBA1B	3.65959e-06	0.626442	0.867	0.613	1	TUBA1B	DYNC1I2+CAF-C1
PSMD11	3.92924e-06	0.50274	0.427	0.155	1	PSMD11	DYNC1I2+CAF-C1
MTDH	4.78459e-06	0.635002	0.76	0.42	1	MTDH	DYNC1I2+CAF-C1
SPPL2A	5.44675e-06	0.527113	0.507	0.221	1	SPPL2A	DYNC1I2+CAF-C1
RSF1	6.09041e-06	0.549137	0.52	0.232	1	RSF1	DYNC1I2+CAF-C1
FHL2	6.71748e-06	0.560049	0.653	0.337	1	FHL2	DYNC1I2+CAF-C1
PHLDA3	1.04409e-05	0.543156	0.533	0.232	1	PHLDA3	DYNC1I2+CAF-C1
EPDR1	1.09295e-05	0.515052	0.373	0.127	1	EPDR1	DYNC1I2+CAF-C1
GTF3C6	1.10739e-05	0.55449	0.48	0.204	1	GTF3C6	DYNC1I2+CAF-C1
PRKAR1A	1.14554e-05	0.584637	0.693	0.37	1	PRKAR1A	DYNC1I2+CAF-C1
FNTA	1.24717e-05	0.605293	0.427	0.166	1	FNTA	DYNC1I2+CAF-C1
ATG3	1.29194e-05	0.684005	0.413	0.155	1	ATG3	DYNC1I2+CAF-C1
F2R	1.45781e-05	0.725645	0.64	0.343	1	F2R	DYNC1I2+CAF-C1
NFKBIZ	1.69926e-05	0.513716	0.413	0.155	1	NFKBIZ	DYNC1I2+CAF-C1
ELN	1.70852e-05	0.704801	0.773	0.481	1	ELN	DYNC1I2+CAF-C1
HES4	1.86792e-05	0.637862	0.333	0.105	1	HES4	DYNC1I2+CAF-C1
FBXW11	2.18303e-05	0.519429	0.28	0.077	1	FBXW11	DYNC1I2+CAF-C1
TUBB	2.53124e-05	0.591705	0.773	0.464	1	TUBB	DYNC1I2+CAF-C1
CTBP2	2.60042e-05	0.513799	0.387	0.144	1	CTBP2	DYNC1I2+CAF-C1
COL10A1	2.61249e-05	0.521105	0.373	0.133	1	COL10A1	DYNC1I2+CAF-C1
CANX	2.70049e-05	0.587691	0.733	0.431	1	CANX	DYNC1I2+CAF-C1
AKR1A1	2.7219e-05	0.521515	0.507	0.227	1	AKR1A1	DYNC1I2+CAF-C1
OS9	2.98984e-05	0.567094	0.627	0.354	1	OS9	DYNC1I2+CAF-C1
PLEKHA1	3.01401e-05	0.559546	0.48	0.215	1	PLEKHA1	DYNC1I2+CAF-C1
LDLRAD4	3.09155e-05	0.751951	0.253	0.066	1	LDLRAD4	DYNC1I2+CAF-C1
CIR1	3.21608e-05	0.517455	0.48	0.199	1	CIR1	DYNC1I2+CAF-C1
BGN	3.27208e-05	0.520338	0.92	0.729	1	BGN	DYNC1I2+CAF-C1
PPP2CA	3.43307e-05	0.543957	0.36	0.133	1	PPP2CA	DYNC1I2+CAF-C1
PDLIM3	3.45059e-05	0.67165	0.667	0.359	1	PDLIM3	DYNC1I2+CAF-C1
COL1A2	3.9178e-05	0.567869	0.88	0.718	1	COL1A2	DYNC1I2+CAF-C1
ARCN1	4.46553e-05	0.529247	0.373	0.149	1	ARCN1	DYNC1I2+CAF-C1
COL1A1	5.0972e-05	0.959452	0.827	0.602	1	COL1A1	DYNC1I2+CAF-C1
UBE2N	5.12358e-05	0.551945	0.44	0.182	1	UBE2N	DYNC1I2+CAF-C1
SOCS5	5.63579e-05	0.532937	0.24	0.061	1	SOCS5	DYNC1I2+CAF-C1
CALCOCO2	5.76513e-05	0.561615	0.56	0.282	1	CALCOCO2	DYNC1I2+CAF-C1
RB1CC1	7.12172e-05	0.563454	0.427	0.177	1	RB1CC1	DYNC1I2+CAF-C1
VCAN	7.25869e-05	0.740184	0.707	0.381	1	VCAN	DYNC1I2+CAF-C1
PRSS23	7.34248e-05	0.654402	0.507	0.232	1	PRSS23	DYNC1I2+CAF-C1
TNFRSF19	7.38246e-05	0.622556	0.267	0.077	1	TNFRSF19	DYNC1I2+CAF-C1
CHD9	7.39038e-05	0.551606	0.573	0.32	1	CHD9	DYNC1I2+CAF-C1
CLIC1	7.72716e-05	0.60875	0.787	0.497	1	CLIC1	DYNC1I2+CAF-C1
FBN1	8.3353e-05	0.681632	0.653	0.392	1	FBN1	DYNC1I2+CAF-C1
COL21A1	8.41358e-05	0.510737	0.387	0.155	1	COL21A1	DYNC1I2+CAF-C1
APOL1	9.13749e-05	0.524972	0.413	0.182	1	APOL1	DYNC1I2+CAF-C1
RNF11	9.27522e-05	0.603771	0.427	0.188	1	RNF11	DYNC1I2+CAF-C1
ZC3H15	9.50474e-05	0.528264	0.493	0.249	1	ZC3H15	DYNC1I2+CAF-C1
COL5A2	9.60824e-05	0.61833	0.587	0.315	1	COL5A2	DYNC1I2+CAF-C1
TPST2	9.79764e-05	0.599105	0.12	0.011	1	TPST2	DYNC1I2+CAF-C1
ILK	0.00010545	0.620378	0.587	0.337	1	ILK	DYNC1I2+CAF-C1
AP2M1	0.000113615	0.521383	0.64	0.359	1	AP2M1	DYNC1I2+CAF-C1
PRNP	0.000116956	0.579905	0.693	0.387	1	PRNP	DYNC1I2+CAF-C1
YIPF5	0.000134756	0.59496	0.453	0.193	1	YIPF5	DYNC1I2+CAF-C1
COL6A2	0.000139204	0.504961	0.827	0.608	1	COL6A2	DYNC1I2+CAF-C1
SERPINE2	0.000143195	0.517999	0.427	0.193	1	SERPINE2	DYNC1I2+CAF-C1
EFEMP1	0.000150829	0.625763	0.747	0.436	1	EFEMP1	DYNC1I2+CAF-C1
RRBP1	0.000164019	0.526126	0.6	0.359	1	RRBP1	DYNC1I2+CAF-C1
DHX9	0.00016644	0.52835	0.36	0.149	1	DHX9	DYNC1I2+CAF-C1
ACTB	0.000180555	0.598061	0.973	0.934	1	ACTB	DYNC1I2+CAF-C1
MEAF6	0.000210186	0.514598	0.493	0.238	1	MEAF6	DYNC1I2+CAF-C1
FSTL1	0.00023166	0.508029	0.84	0.552	1	FSTL1	DYNC1I2+CAF-C1
ATP6AP1	0.000245136	0.544519	0.453	0.227	1	ATP6AP1	DYNC1I2+CAF-C1
PLS3	0.000292063	0.50181	0.733	0.459	1	PLS3	DYNC1I2+CAF-C1
TAGLN	0.00029894	0.716842	0.947	0.751	1	TAGLN	DYNC1I2+CAF-C1
CCDC146	0.000331456	0.550862	0.147	0.028	1	CCDC146	DYNC1I2+CAF-C1
TGFB1	0.000345687	0.535918	0.373	0.177	1	TGFB1	DYNC1I2+CAF-C1
PSMD4	0.000375717	0.660883	0.453	0.227	1	PSMD4	DYNC1I2+CAF-C1
TMBIM1	0.00038044	0.524775	0.507	0.271	1	TMBIM1	DYNC1I2+CAF-C1
EXOC5	0.00041098	0.518358	0.227	0.072	1	EXOC5	DYNC1I2+CAF-C1
IMP4	0.000413961	0.747492	0.253	0.088	1	IMP4	DYNC1I2+CAF-C1
KLHDC2	0.000481757	0.539846	0.413	0.199	1	KLHDC2	DYNC1I2+CAF-C1
SULF1	0.000494649	0.714162	0.387	0.188	1	SULF1	DYNC1I2+CAF-C1
EIF4A3	0.000523697	0.614226	0.453	0.232	1	EIF4A3	DYNC1I2+CAF-C1
TNIP1	0.000574721	0.577805	0.24	0.083	1	TNIP1	DYNC1I2+CAF-C1
SPON2	0.000716496	0.65385	0.52	0.287	1	SPON2	DYNC1I2+CAF-C1
TMEM181	0.000776468	0.553298	0.2	0.061	1	TMEM181	DYNC1I2+CAF-C1
FAM177A1	0.000831635	0.558787	0.453	0.232	1	FAM177A1	DYNC1I2+CAF-C1
C11orf96	0.000841203	0.713326	0.44	0.227	1	C11orf96	DYNC1I2+CAF-C1
EIF4E	0.0008449	0.510729	0.28	0.11	1	EIF4E	DYNC1I2+CAF-C1
PBX1	0.000851441	0.501365	0.52	0.287	1	PBX1	DYNC1I2+CAF-C1
USP11	0.000858292	0.523237	0.427	0.204	1	USP11	DYNC1I2+CAF-C1
KLF10	0.000893132	0.714259	0.333	0.149	1	KLF10	DYNC1I2+CAF-C1
IMP3	0.000929836	0.734676	0.32	0.144	1	IMP3	DYNC1I2+CAF-C1
ID4	0.00101184	0.630851	0.28	0.116	1	ID4	DYNC1I2+CAF-C1
TGFBI	0.00105161	0.697993	0.227	0.077	1	TGFBI	DYNC1I2+CAF-C1
ITGA11	0.00133397	0.537764	0.213	0.072	1	ITGA11	DYNC1I2+CAF-C1
PACSIN2	0.00139056	0.564184	0.253	0.099	1	PACSIN2	DYNC1I2+CAF-C1
GPS1	0.00141141	0.526967	0.28	0.116	1	GPS1	DYNC1I2+CAF-C1
TPM2	0.00144175	0.633698	0.827	0.619	1	TPM2	DYNC1I2+CAF-C1
FHL1	0.00151894	0.537157	0.76	0.525	1	FHL1	DYNC1I2+CAF-C1
CTGF	0.00191099	0.56736	0.907	0.691	1	CTGF	DYNC1I2+CAF-C1
SCG2	0.00236698	0.601334	0.213	0.077	1	SCG2	DYNC1I2+CAF-C1
DERL1	0.00248928	0.677764	0.4	0.215	1	DERL1	DYNC1I2+CAF-C1
HTRA3	0.00261263	0.644865	0.373	0.204	1	HTRA3	DYNC1I2+CAF-C1
ANKRD11	0.00271207	0.604769	0.413	0.227	1	ANKRD11	DYNC1I2+CAF-C1
FAM217B	0.00311754	0.595306	0.12	0.028	1	FAM217B	DYNC1I2+CAF-C1
POSTN	0.00386665	1.06696	0.44	0.265	1	POSTN	DYNC1I2+CAF-C1
COL6A3	0.00397065	0.553202	0.707	0.519	1	COL6A3	DYNC1I2+CAF-C1
ANGEL2	0.00400053	0.574548	0.187	0.066	1	ANGEL2	DYNC1I2+CAF-C1
CALM2	0.00464793	0.519515	0.947	0.724	1	CALM2	DYNC1I2+CAF-C1
SPIDR	0.00525395	0.909284	0.173	0.061	1	SPIDR	DYNC1I2+CAF-C1
DIO2	0.00534649	0.510443	0.213	0.083	1	DIO2	DYNC1I2+CAF-C1
C1orf198	0.00609621	0.500317	0.28	0.133	1	C1orf198	DYNC1I2+CAF-C1
ACTA2	0.00647489	0.633752	0.827	0.63	1	ACTA2	DYNC1I2+CAF-C1
NGRN	0.00663595	0.523288	0.16	0.055	1	NGRN	DYNC1I2+CAF-C1
MYL9	0.00761492	0.818188	0.76	0.558	1	MYL9	DYNC1I2+CAF-C1
VCAM1	0.00935207	0.619511	0.213	0.099	1	VCAM1	DYNC1I2+CAF-C1
PARK7	3.46597e-11	0.966673	0.897	0.463	2	PARK7	DYNLL1+CAF-C2
DYNLL1	3.16823e-08	1.09546	0.882	0.543	2	DYNLL1	DYNLL1+CAF-C2
RPL26	3.84063e-08	0.621052	0.985	0.809	2	RPL26	DYNLL1+CAF-C2
RPL37	5.85553e-08	0.725652	0.956	0.888	2	RPL37	DYNLL1+CAF-C2
RPS23	2.00836e-07	0.631	0.985	0.899	2	RPS23	DYNLL1+CAF-C2
RPL17	2.43499e-07	0.779023	0.603	0.25	2	RPL17	DYNLL1+CAF-C2
RPS12	2.78478e-07	0.59139	0.985	0.936	2	RPS12	DYNLL1+CAF-C2
RPLP1	5.28137e-07	0.546562	1	0.968	2	RPLP1	DYNLL1+CAF-C2
RPS13	1.08107e-06	0.579385	0.956	0.809	2	RPS13	DYNLL1+CAF-C2
DDT	1.15768e-06	0.810059	0.588	0.277	2	DDT	DYNLL1+CAF-C2
RPL14	4.0473e-06	0.679996	0.941	0.787	2	RPL14	DYNLL1+CAF-C2
TPT1	5.44982e-06	0.571035	1	0.952	2	TPT1	DYNLL1+CAF-C2
NDUFA12	6.0125e-06	0.749646	0.559	0.255	2	NDUFA12	DYNLL1+CAF-C2
RPL12	7.55657e-06	0.553266	0.956	0.846	2	RPL12	DYNLL1+CAF-C2
MRPL51	8.23996e-06	0.691552	0.588	0.309	2	MRPL51	DYNLL1+CAF-C2
MIF	9.51609e-06	0.62086	0.676	0.367	2	MIF	DYNLL1+CAF-C2
PRRX1	1.45355e-05	0.581983	0.618	0.309	2	PRRX1	DYNLL1+CAF-C2
RPS10	1.61764e-05	0.646391	0.779	0.548	2	RPS10	DYNLL1+CAF-C2
CAMK2N1	1.8629e-05	0.756107	0.647	0.351	2	CAMK2N1	DYNLL1+CAF-C2
RPL39	1.89265e-05	0.552409	0.971	0.878	2	RPL39	DYNLL1+CAF-C2
SDE2	2.12379e-05	0.529456	0.162	0.021	2	SDE2	DYNLL1+CAF-C2
DNAJC15	3.27804e-05	0.770319	0.529	0.266	2	DNAJC15	DYNLL1+CAF-C2
RPS27	4.10379e-05	0.540977	1	0.931	2	RPS27	DYNLL1+CAF-C2
RPS11	4.59619e-05	0.517812	0.956	0.798	2	RPS11	DYNLL1+CAF-C2
NDUFS6	4.66221e-05	0.559047	0.544	0.303	2	NDUFS6	DYNLL1+CAF-C2
BRI3	6.46434e-05	0.751122	0.603	0.324	2	BRI3	DYNLL1+CAF-C2
NDUFA13	6.63414e-05	0.535672	0.588	0.309	2	NDUFA13	DYNLL1+CAF-C2
S100A13	6.66109e-05	0.693452	0.809	0.559	2	S100A13	DYNLL1+CAF-C2
BLOC1S4	6.84267e-05	0.673444	0.294	0.096	2	BLOC1S4	DYNLL1+CAF-C2
RPS27A	7.26722e-05	0.507825	0.956	0.915	2	RPS27A	DYNLL1+CAF-C2
TRIM44	7.48688e-05	0.746325	0.382	0.154	2	TRIM44	DYNLL1+CAF-C2
SNHG8	7.86855e-05	0.740417	0.662	0.404	2	SNHG8	DYNLL1+CAF-C2
IGHG1	0.000100609	0.597077	0.279	0.09	2	IGHG1	DYNLL1+CAF-C2
RPS21	0.00011812	0.501737	0.897	0.745	2	RPS21	DYNLL1+CAF-C2
C1orf122	0.000125262	0.592834	0.426	0.186	2	C1orf122	DYNLL1+CAF-C2
FXYD1	0.000135466	0.62055	0.691	0.452	2	FXYD1	DYNLL1+CAF-C2
SFRP1	0.000139427	0.965131	0.191	0.043	2	SFRP1	DYNLL1+CAF-C2
CEBPB	0.000191799	0.65424	0.691	0.436	2	CEBPB	DYNLL1+CAF-C2
RPL36AL	0.000273026	0.6477	0.838	0.612	2	RPL36AL	DYNLL1+CAF-C2
XPA	0.000296265	0.756487	0.309	0.112	2	XPA	DYNLL1+CAF-C2
TOMM7	0.000299419	0.531997	0.912	0.729	2	TOMM7	DYNLL1+CAF-C2
MGP	0.000304699	0.533589	0.956	0.899	2	MGP	DYNLL1+CAF-C2
RARRES1	0.000318537	1.14833	0.544	0.319	2	RARRES1	DYNLL1+CAF-C2
VGLL3	0.000377211	0.610877	0.529	0.266	2	VGLL3	DYNLL1+CAF-C2
PTMS	0.000475525	0.513361	0.735	0.468	2	PTMS	DYNLL1+CAF-C2
RPS27L	0.000504241	0.694716	0.779	0.58	2	RPS27L	DYNLL1+CAF-C2
NDUFA8	0.000624429	0.503694	0.324	0.133	2	NDUFA8	DYNLL1+CAF-C2
MAML2	0.000688785	0.511487	0.382	0.181	2	MAML2	DYNLL1+CAF-C2
GAS1	0.000727597	0.607984	0.368	0.17	2	GAS1	DYNLL1+CAF-C2
UQCR10	0.00084197	0.677602	0.632	0.404	2	UQCR10	DYNLL1+CAF-C2
COX7C	0.000890714	0.527095	0.838	0.633	2	COX7C	DYNLL1+CAF-C2
SELENOM	0.00117117	0.525679	0.794	0.622	2	SELENOM	DYNLL1+CAF-C2
SYNPO2	0.00127063	0.568816	0.412	0.207	2	SYNPO2	DYNLL1+CAF-C2
UQCRB	0.00145016	0.506034	0.824	0.612	2	UQCRB	DYNLL1+CAF-C2
MIR4435-2HG	0.00151412	0.530172	0.368	0.181	2	MIR4435-2HG	DYNLL1+CAF-C2
CCDC80	0.00176398	0.779727	0.794	0.681	2	CCDC80	DYNLL1+CAF-C2
LEPR	0.00189783	0.779845	0.324	0.154	2	LEPR	DYNLL1+CAF-C2
LMO4	0.00201313	0.536025	0.603	0.41	2	LMO4	DYNLL1+CAF-C2
C3	0.00213156	0.825863	0.588	0.394	2	C3	DYNLL1+CAF-C2
TMEM214	0.0027073	0.503738	0.279	0.122	2	TMEM214	DYNLL1+CAF-C2
PPP1R14A	0.00293583	0.749779	0.676	0.463	2	PPP1R14A	DYNLL1+CAF-C2
AC020656.1	0.00297885	0.503244	0.368	0.181	2	AC020656.1	DYNLL1+CAF-C2
CLMP	0.00312808	0.519996	0.456	0.266	2	CLMP	DYNLL1+CAF-C2
PIK3R1	0.00314809	0.525917	0.662	0.495	2	PIK3R1	DYNLL1+CAF-C2
PRDX1	0.00336827	0.618251	0.794	0.553	2	PRDX1	DYNLL1+CAF-C2
NES	0.00339106	0.605866	0.147	0.043	2	NES	DYNLL1+CAF-C2
CEBPD	0.00344734	0.636403	0.662	0.5	2	CEBPD	DYNLL1+CAF-C2
MT-ND6	0.00380575	0.618334	0.515	0.303	2	MT-ND6	DYNLL1+CAF-C2
TXNIP	0.00403986	0.681095	0.794	0.729	2	TXNIP	DYNLL1+CAF-C2
RAPGEF5	0.0042907	0.572933	0.397	0.207	2	RAPGEF5	DYNLL1+CAF-C2
USP53	0.0044654	0.559169	0.515	0.319	2	USP53	DYNLL1+CAF-C2
PLEKHA2	0.0045659	0.508066	0.25	0.106	2	PLEKHA2	DYNLL1+CAF-C2
ZDBF2	0.00463746	0.507205	0.103	0.021	2	ZDBF2	DYNLL1+CAF-C2
VEGFB	0.0047147	0.645613	0.456	0.277	2	VEGFB	DYNLL1+CAF-C2
DYNLT1	0.004804	0.771802	0.559	0.335	2	DYNLT1	DYNLL1+CAF-C2
RND3	0.00484903	0.523265	0.529	0.34	2	RND3	DYNLL1+CAF-C2
CBX3	0.00488662	0.718069	0.456	0.277	2	CBX3	DYNLL1+CAF-C2
PITPNA	0.00537769	0.526759	0.176	0.064	2	PITPNA	DYNLL1+CAF-C2
IGHG3	0.00563259	0.580672	0.309	0.149	2	IGHG3	DYNLL1+CAF-C2
HSPE1	0.0058023	0.513639	0.544	0.314	2	HSPE1	DYNLL1+CAF-C2
CMC1	0.00586244	0.503836	0.265	0.122	2	CMC1	DYNLL1+CAF-C2
PLA2G2A	0.00589895	0.706439	0.25	0.112	2	PLA2G2A	DYNLL1+CAF-C2
SUGCT	0.00618773	0.582726	0.221	0.09	2	SUGCT	DYNLL1+CAF-C2
MITD1	0.00642301	0.50575	0.294	0.138	2	MITD1	DYNLL1+CAF-C2
NDUFB11	0.00645994	0.621835	0.588	0.362	2	NDUFB11	DYNLL1+CAF-C2
SFRP2	0.00664784	1.16443	0.397	0.239	2	SFRP2	DYNLL1+CAF-C2
IGFBP4	0.00913935	0.576796	0.647	0.5	2	IGFBP4	DYNLL1+CAF-C2
PARK71	1.37462e-08	1.05683	1	0.52	3	PARK7	PARK7+CAF-C3
UBB	1.23703e-06	0.721347	0.968	0.773	3	UBB	PARK7+CAF-C3
ZFAND6	2.32933e-06	0.76353	0.581	0.218	3	ZFAND6	PARK7+CAF-C3
PGAM1	3.23805e-06	1.00572	0.742	0.364	3	PGAM1	PARK7+CAF-C3
PI4KB	1.53064e-05	0.650341	0.323	0.076	3	PI4KB	PARK7+CAF-C3
SCAPER	1.95634e-05	0.610274	0.258	0.049	3	SCAPER	PARK7+CAF-C3
LMCD1	2.04551e-05	0.941593	0.774	0.427	3	LMCD1	PARK7+CAF-C3
RASL11B	3.48117e-05	0.717734	0.258	0.053	3	RASL11B	PARK7+CAF-C3
FOLR2	3.59949e-05	0.764344	0.129	0.009	3	FOLR2	PARK7+CAF-C3
RRAGA	5.10849e-05	0.809907	0.613	0.307	3	RRAGA	PARK7+CAF-C3
RCN3	5.1805e-05	1.04767	0.613	0.342	3	RCN3	PARK7+CAF-C3
MORF4L2	7.11321e-05	0.691798	0.806	0.52	3	MORF4L2	PARK7+CAF-C3
HNRNPF	0.000145083	1.00845	0.613	0.356	3	HNRNPF	PARK7+CAF-C3
WFS1	0.000152618	0.554581	0.355	0.116	3	WFS1	PARK7+CAF-C3
PSMC5	0.00016926	0.791235	0.613	0.333	3	PSMC5	PARK7+CAF-C3
CDC37	0.000170799	0.5481	0.677	0.391	3	CDC37	PARK7+CAF-C3
MLLT11	0.000186472	0.633842	0.129	0.013	3	MLLT11	PARK7+CAF-C3
ANAPC7	0.000187016	0.603413	0.226	0.049	3	ANAPC7	PARK7+CAF-C3
DCAF12	0.000244429	0.520777	0.323	0.098	3	DCAF12	PARK7+CAF-C3
WASHC1	0.000245898	0.60477	0.387	0.142	3	WASHC1	PARK7+CAF-C3
EIF2A	0.000309706	0.820819	0.516	0.262	3	EIF2A	PARK7+CAF-C3
NTMT1	0.000356686	0.697767	0.355	0.133	3	NTMT1	PARK7+CAF-C3
COQ8A	0.000419026	0.54974	0.194	0.04	3	COQ8A	PARK7+CAF-C3
NDFIP1	0.00044905	0.88179	0.677	0.444	3	NDFIP1	PARK7+CAF-C3
CLEC11A	0.00046014	0.91049	0.645	0.396	3	CLEC11A	PARK7+CAF-C3
CHID1	0.00048994	0.634972	0.548	0.289	3	CHID1	PARK7+CAF-C3
KDELR2	0.000542848	0.6412	0.774	0.529	3	KDELR2	PARK7+CAF-C3
CIB1	0.000578857	0.545259	0.581	0.302	3	CIB1	PARK7+CAF-C3
DKK3	0.000582723	0.899101	0.774	0.533	3	DKK3	PARK7+CAF-C3
SCAND1	0.00067132	0.611355	0.548	0.293	3	SCAND1	PARK7+CAF-C3
NEU1	0.000705782	0.748109	0.452	0.209	3	NEU1	PARK7+CAF-C3
MFAP4	0.000735411	0.783651	0.839	0.662	3	MFAP4	PARK7+CAF-C3
TMEM115	0.000764202	0.537458	0.387	0.164	3	TMEM115	PARK7+CAF-C3
TVP23B	0.000768195	0.503747	0.194	0.044	3	TVP23B	PARK7+CAF-C3
PSMF1	0.00077174	0.564801	0.419	0.182	3	PSMF1	PARK7+CAF-C3
ETS2	0.000787043	0.53594	0.419	0.173	3	ETS2	PARK7+CAF-C3
DHPS	0.000795515	0.59126	0.419	0.178	3	DHPS	PARK7+CAF-C3
BEX3	0.000898506	0.841566	0.677	0.453	3	BEX3	PARK7+CAF-C3
CALM21	0.000918294	0.5895	0.935	0.769	3	CALM2	PARK7+CAF-C3
CCT6A	0.000991121	0.523557	0.452	0.2	3	CCT6A	PARK7+CAF-C3
NMD3	0.00100194	0.509859	0.355	0.138	3	NMD3	PARK7+CAF-C3
LAPTM4A	0.00105061	0.753825	0.839	0.733	3	LAPTM4A	PARK7+CAF-C3
ARHGDIA	0.00107141	0.62173	0.677	0.396	3	ARHGDIA	PARK7+CAF-C3
PLPP3	0.00107222	0.690043	0.645	0.391	3	PLPP3	PARK7+CAF-C3
TNFRSF12A	0.00116511	0.84264	0.484	0.227	3	TNFRSF12A	PARK7+CAF-C3
TUBA1B1	0.00120638	0.662401	0.935	0.653	3	TUBA1B	PARK7+CAF-C3
KCNS3	0.00122064	0.82453	0.323	0.116	3	KCNS3	PARK7+CAF-C3
FYTTD1	0.00122865	0.589799	0.419	0.182	3	FYTTD1	PARK7+CAF-C3
VSNL1	0.00124466	0.616092	0.161	0.031	3	VSNL1	PARK7+CAF-C3
OAZ2	0.00126419	0.512117	0.452	0.218	3	OAZ2	PARK7+CAF-C3
CREB1	0.00129195	0.507176	0.355	0.138	3	CREB1	PARK7+CAF-C3
NMRAL1	0.00141814	0.505183	0.258	0.08	3	NMRAL1	PARK7+CAF-C3
MAP2K7	0.00148496	0.55226	0.226	0.067	3	MAP2K7	PARK7+CAF-C3
RSL1D1	0.00155228	0.697868	0.548	0.316	3	RSL1D1	PARK7+CAF-C3
H2AFJ	0.00162436	0.668417	0.677	0.422	3	H2AFJ	PARK7+CAF-C3
RNPEP	0.0016522	0.973956	0.323	0.133	3	RNPEP	PARK7+CAF-C3
HSPA8	0.00181919	0.631623	0.871	0.591	3	HSPA8	PARK7+CAF-C3
TSPAN6	0.00184164	0.520003	0.323	0.124	3	TSPAN6	PARK7+CAF-C3
PSMC2	0.00190749	0.817511	0.452	0.231	3	PSMC2	PARK7+CAF-C3
RAB5C	0.00199181	0.558569	0.613	0.36	3	RAB5C	PARK7+CAF-C3
CTSF	0.00200734	0.748586	0.613	0.4	3	CTSF	PARK7+CAF-C3
FBLN5	0.00209165	0.972857	0.71	0.533	3	FBLN5	PARK7+CAF-C3
FKBP10	0.00210104	0.693616	0.613	0.378	3	FKBP10	PARK7+CAF-C3
PCNP	0.00220621	0.82612	0.677	0.422	3	PCNP	PARK7+CAF-C3
AXL	0.00220631	0.806814	0.484	0.284	3	AXL	PARK7+CAF-C3
GAPDH	0.00237105	0.839742	0.871	0.693	3	GAPDH	PARK7+CAF-C3
ERH	0.00241259	0.513382	0.71	0.418	3	ERH	PARK7+CAF-C3
RELA	0.00246347	0.606913	0.323	0.133	3	RELA	PARK7+CAF-C3
AP2M11	0.00259124	0.670356	0.645	0.413	3	AP2M1	PARK7+CAF-C3
E4F1	0.00267029	0.661452	0.194	0.053	3	E4F1	PARK7+CAF-C3
EIF4A31	0.00283136	0.577787	0.484	0.271	3	EIF4A3	PARK7+CAF-C3
AEBP2	0.00288493	0.552077	0.355	0.151	3	AEBP2	PARK7+CAF-C3
LRPAP1	0.00291304	0.55728	0.71	0.476	3	LRPAP1	PARK7+CAF-C3
GRB2	0.00291591	0.632421	0.355	0.156	3	GRB2	PARK7+CAF-C3
DPM3	0.00293699	0.7311	0.452	0.244	3	DPM3	PARK7+CAF-C3
PSMD3	0.00299513	0.575703	0.419	0.213	3	PSMD3	PARK7+CAF-C3
SEC13	0.00308949	0.59048	0.452	0.236	3	SEC13	PARK7+CAF-C3
NSMCE3	0.00343976	0.594704	0.323	0.133	3	NSMCE3	PARK7+CAF-C3
HSP90AB1	0.0035143	0.590517	0.871	0.702	3	HSP90AB1	PARK7+CAF-C3
HPS5	0.00394837	0.584007	0.258	0.093	3	HPS5	PARK7+CAF-C3
TTC1	0.00399805	0.625204	0.419	0.222	3	TTC1	PARK7+CAF-C3
FIBIN	0.0040765	0.670876	0.71	0.436	3	FIBIN	PARK7+CAF-C3
PPP1CB	0.00409435	0.742353	0.742	0.596	3	PPP1CB	PARK7+CAF-C3
SLC25A6	0.0040966	0.501725	0.839	0.644	3	SLC25A6	PARK7+CAF-C3
SLC41A3	0.00424386	0.801163	0.29	0.116	3	SLC41A3	PARK7+CAF-C3
TFG	0.004272	0.681616	0.484	0.271	3	TFG	PARK7+CAF-C3
DNASE2	0.00428748	0.556976	0.516	0.32	3	DNASE2	PARK7+CAF-C3
NET1	0.00440446	0.874466	0.323	0.133	3	NET1	PARK7+CAF-C3
TSC22D1	0.00445139	0.55778	0.871	0.64	3	TSC22D1	PARK7+CAF-C3
KDELR3	0.00451002	0.510746	0.387	0.178	3	KDELR3	PARK7+CAF-C3
MT1E	0.00464206	0.689267	0.806	0.591	3	MT1E	PARK7+CAF-C3
GADD45B	0.00470558	1.10824	0.71	0.52	3	GADD45B	PARK7+CAF-C3
RAB7A	0.00471581	0.604542	0.613	0.44	3	RAB7A	PARK7+CAF-C3
NUCB2	0.00479942	0.718937	0.677	0.431	3	NUCB2	PARK7+CAF-C3
SRSF2	0.00483786	0.530243	0.645	0.449	3	SRSF2	PARK7+CAF-C3
NABP2	0.00492674	0.596635	0.29	0.116	3	NABP2	PARK7+CAF-C3
TRA2B	0.00492745	0.732291	0.548	0.342	3	TRA2B	PARK7+CAF-C3
UBE2D3	0.00517503	0.577518	0.645	0.458	3	UBE2D3	PARK7+CAF-C3
CDKN2C	0.00522739	0.614759	0.323	0.151	3	CDKN2C	PARK7+CAF-C3
ATP6V1E1	0.00535369	0.631568	0.484	0.28	3	ATP6V1E1	PARK7+CAF-C3
NDN	0.00544451	0.515424	0.645	0.427	3	NDN	PARK7+CAF-C3
GPKOW	0.00555115	0.539386	0.226	0.076	3	GPKOW	PARK7+CAF-C3
TSPAN13	0.00575986	0.560076	0.194	0.058	3	TSPAN13	PARK7+CAF-C3
WDR83OS	0.00630473	0.644659	0.613	0.409	3	WDR83OS	PARK7+CAF-C3
TSPAN4	0.0064301	0.560881	0.71	0.507	3	TSPAN4	PARK7+CAF-C3
CHMP3	0.00643287	0.786534	0.581	0.373	3	CHMP3	PARK7+CAF-C3
TUFM	0.00666251	0.573796	0.581	0.369	3	TUFM	PARK7+CAF-C3
NXT1	0.00677188	0.654547	0.29	0.124	3	NXT1	PARK7+CAF-C3
DPT	0.00679025	0.643002	0.742	0.493	3	DPT	PARK7+CAF-C3
WNT5A	0.00716628	0.636726	0.258	0.098	3	WNT5A	PARK7+CAF-C3
FHL11	0.00751038	0.519568	0.774	0.569	3	FHL1	PARK7+CAF-C3
ABHD14A	0.00758109	0.557138	0.387	0.204	3	ABHD14A	PARK7+CAF-C3
MXRA8	0.00790624	0.699966	0.742	0.547	3	MXRA8	PARK7+CAF-C3
ERI3	0.0080337	0.552003	0.355	0.173	3	ERI3	PARK7+CAF-C3
CUTA	0.00837497	0.612632	0.516	0.347	3	CUTA	PARK7+CAF-C3
TPRA1	0.0084712	0.542435	0.194	0.062	3	TPRA1	PARK7+CAF-C3
CNN31	0.00906545	0.659532	0.774	0.591	3	CNN3	PARK7+CAF-C3

## Sheet: Supplementary Table 4
Supplementary Table 4. Feature genes of each NMF cluster in CD8+T cells.
	p_val	avg_log2FC	pct.1	pct.2	cluster	gene	Name/Cell type
VIM	7.38072e-06	1.08333	0.714	0.431	0	VIM	VIM+CD8+T cells C1
NT5C3B	0.000379713	1.24776	0.125	0.013	0	NT5C3B	VIM+CD8+T cells C1
PCM1	0.000424401	1.24332	0.125	0.013	0	PCM1	VIM+CD8+T cells C1
MLLT6	0.000931674	1.19509	0.161	0.033	0	MLLT6	VIM+CD8+T cells C1
IMMT	0.00133407	1.39616	0.125	0.02	0	IMMT	VIM+CD8+T cells C1
SELL	0.00163065	1.33735	0.107	0.013	0	SELL	VIM+CD8+T cells C1
SLC9A3R1	0.00169686	1.04858	0.125	0.02	0	SLC9A3R1	VIM+CD8+T cells C1
TXNDC17	0.00322151	1.15122	0.143	0.033	0	TXNDC17	VIM+CD8+T cells C1
SERINC5	0.00431992	1.30701	0.196	0.065	0	SERINC5	VIM+CD8+T cells C1
CEBPZ	0.00497687	1.20548	0.107	0.02	0	CEBPZ	VIM+CD8+T cells C1
EMC3	0.00583113	0.913947	0.107	0.02	0	EMC3	VIM+CD8+T cells C1
RBM26	0.00583113	0.878819	0.107	0.02	0	RBM26	VIM+CD8+T cells C1
PEPD	0.0062361	0.859918	0.107	0.02	0	PEPD	VIM+CD8+T cells C1
CD2	0.00634716	0.693987	0.536	0.366	0	CD2	VIM+CD8+T cells C1
PCBP1	0.00700558	1.04705	0.143	0.039	0	PCBP1	VIM+CD8+T cells C1
HLA-DQB1	0.00826598	0.751277	0.232	0.092	0	HLA-DQB1	VIM+CD8+T cells C1
LCP1	0.00828395	1.16566	0.321	0.176	0	LCP1	VIM+CD8+T cells C1
SPINK1	0.00959756	0.845052	0.429	0.261	0	SPINK1	VIM+CD8+T cells C1
UBA52	3.29559e-10	1.49327	0.709	0.24	1	UBA52	UBA52+CD8+T cells C2
SSBP1	1.40981e-05	1.3961	0.145	0.006	1	SSBP1	UBA52+CD8+T cells C2
NSD1	1.61236e-05	1.49951	0.164	0.013	1	NSD1	UBA52+CD8+T cells C2
RETREG3	3.41462e-05	1.10368	0.109	0	1	RETREG3	UBA52+CD8+T cells C2
RBX1	3.41462e-05	0.915781	0.109	0	1	RBX1	UBA52+CD8+T cells C2
GLUD1	0.000201034	1.20872	0.2	0.039	1	GLUD1	UBA52+CD8+T cells C2
AURKAIP1	0.00027317	1.1057	0.182	0.032	1	AURKAIP1	UBA52+CD8+T cells C2
PRKAA1	0.000308227	0.965607	0.109	0.006	1	PRKAA1	UBA52+CD8+T cells C2
RPL18	0.0006065	0.756503	0.582	0.357	1	RPL18	UBA52+CD8+T cells C2
SNRPG	0.000833363	1.15014	0.164	0.032	1	SNRPG	UBA52+CD8+T cells C2
RPS15	0.00088379	0.607479	0.764	0.5	1	RPS15	UBA52+CD8+T cells C2
RPL27A	0.000962138	0.575507	0.836	0.578	1	RPL27A	UBA52+CD8+T cells C2
UQCRFS1	0.00137525	0.991597	0.109	0.013	1	UQCRFS1	UBA52+CD8+T cells C2
GNPAT	0.00148348	0.917356	0.127	0.019	1	GNPAT	UBA52+CD8+T cells C2
IFI27L2	0.00153206	0.928202	0.109	0.013	1	IFI27L2	UBA52+CD8+T cells C2
ASPH	0.00166031	0.94617	0.109	0.013	1	ASPH	UBA52+CD8+T cells C2
DCTD	0.00166031	0.843965	0.109	0.013	1	DCTD	UBA52+CD8+T cells C2
RPS27A	0.0019987	0.598947	0.8	0.584	1	RPS27A	UBA52+CD8+T cells C2
RPS7	0.00207724	0.783044	0.709	0.481	1	RPS7	UBA52+CD8+T cells C2
TUBB	0.00334745	0.897874	0.2	0.058	1	TUBB	UBA52+CD8+T cells C2
CCT4	0.00447751	0.99723	0.164	0.045	1	CCT4	UBA52+CD8+T cells C2
RPL26	0.00454211	0.63771	0.709	0.487	1	RPL26	UBA52+CD8+T cells C2
TSC22D1	0.00456808	0.7192	0.127	0.026	1	TSC22D1	UBA52+CD8+T cells C2
CCNC	0.00478689	0.973266	0.109	0.019	1	CCNC	UBA52+CD8+T cells C2
TALDO1	0.00486448	0.732798	0.127	0.026	1	TALDO1	UBA52+CD8+T cells C2
NCKAP1L	0.0052465	0.737079	0.109	0.019	1	NCKAP1L	UBA52+CD8+T cells C2
VOPP1	0.00536746	0.863003	0.109	0.019	1	VOPP1	UBA52+CD8+T cells C2
MPC2	0.00602126	0.692364	0.164	0.045	1	MPC2	UBA52+CD8+T cells C2
DPY30	0.00621705	1.0087	0.145	0.039	1	DPY30	UBA52+CD8+T cells C2
ABHD17A	0.00705677	0.954502	0.145	0.039	1	ABHD17A	UBA52+CD8+T cells C2
POLR1D	0.00705677	0.823971	0.145	0.039	1	POLR1D	UBA52+CD8+T cells C2
NKG7	0.00731472	0.702894	0.145	0.039	1	NKG7	UBA52+CD8+T cells C2
RPS8	0.00890462	0.620228	0.709	0.519	1	RPS8	UBA52+CD8+T cells C2
MINOS1	0.00904782	0.714908	0.145	0.039	1	MINOS1	UBA52+CD8+T cells C2
LRCH4	0.00907645	0.968728	0.127	0.032	1	LRCH4	UBA52+CD8+T cells C2
CORO1B	0.0093699	0.568481	0.145	0.039	1	CORO1B	UBA52+CD8+T cells C2
IDI1	0.00939878	0.904968	0.164	0.052	1	IDI1	UBA52+CD8+T cells C2
TUBA4A	2.44738e-25	3.10075	0.76	0.063	2	TUBA4A	TUBA4A+CD8+T cells C3
TUBA1B	2.78582e-09	1.91776	0.5	0.113	2	TUBA1B	TUBA4A+CD8+T cells C3
RAB5B	1.00409e-05	1.24338	0.12	0	2	RAB5B	TUBA4A+CD8+T cells C3
ZBTB24	5.79659e-05	1.04731	0.1	0	2	ZBTB24	TUBA4A+CD8+T cells C3
PIM2	0.000408819	1.16015	0.16	0.025	2	PIM2	TUBA4A+CD8+T cells C3
BEX3	0.000518648	1.2636	0.1	0.006	2	BEX3	TUBA4A+CD8+T cells C3
DRAM2	0.00053684	1.15937	0.1	0.006	2	DRAM2	TUBA4A+CD8+T cells C3
PCNA	0.000555625	0.905882	0.1	0.006	2	PCNA	TUBA4A+CD8+T cells C3
RNF11	0.00057502	0.924844	0.1	0.006	2	RNF11	TUBA4A+CD8+T cells C3
RALGAPA1	0.000595045	1.18759	0.1	0.006	2	RALGAPA1	TUBA4A+CD8+T cells C3
CCSER2	0.00059824	0.871933	0.14	0.019	2	CCSER2	TUBA4A+CD8+T cells C3
IRF7	0.000615717	1.04216	0.1	0.006	2	IRF7	TUBA4A+CD8+T cells C3
DECR1	0.000617595	0.95068	0.12	0.013	2	DECR1	TUBA4A+CD8+T cells C3
DBI	0.00120604	0.922389	0.16	0.031	2	DBI	TUBA4A+CD8+T cells C3
CAPZA2	0.00145124	1.09855	0.24	0.075	2	CAPZA2	TUBA4A+CD8+T cells C3
MT1X	0.00147182	1.49131	0.14	0.025	2	MT1X	TUBA4A+CD8+T cells C3
ANXA5	0.00161896	0.979521	0.14	0.025	2	ANXA5	TUBA4A+CD8+T cells C3
SAR1B	0.00173807	0.822128	0.14	0.025	2	SAR1B	TUBA4A+CD8+T cells C3
MDH2	0.00200024	1.23765	0.16	0.038	2	MDH2	TUBA4A+CD8+T cells C3
PTGER4	0.00222504	1.05156	0.48	0.264	2	PTGER4	TUBA4A+CD8+T cells C3
COTL1	0.00232729	0.835151	0.28	0.101	2	COTL1	TUBA4A+CD8+T cells C3
ROCK1	0.00242637	0.883512	0.32	0.132	2	ROCK1	TUBA4A+CD8+T cells C3
DDB2	0.00256168	1.13162	0.16	0.038	2	DDB2	TUBA4A+CD8+T cells C3
XPC	0.002572	0.724507	0.12	0.019	2	XPC	TUBA4A+CD8+T cells C3
RFFL	0.00260815	1.00156	0.1	0.013	2	RFFL	TUBA4A+CD8+T cells C3
TECR	0.00286154	0.885732	0.22	0.069	2	TECR	TUBA4A+CD8+T cells C3
PPM1A	0.00291942	0.778733	0.1	0.013	2	PPM1A	TUBA4A+CD8+T cells C3
BPGM	0.00308744	0.73167	0.1	0.013	2	BPGM	TUBA4A+CD8+T cells C3
HNRNPA0	0.00406995	0.763356	0.42	0.208	2	HNRNPA0	TUBA4A+CD8+T cells C3
PPP1R12A	0.00454661	0.68153	0.24	0.082	2	PPP1R12A	TUBA4A+CD8+T cells C3
KRT10	0.00481768	1.18639	0.16	0.044	2	KRT10	TUBA4A+CD8+T cells C3
ASCC2	0.00581113	1.08439	0.12	0.025	2	ASCC2	TUBA4A+CD8+T cells C3
SF3B5	0.00590389	0.917785	0.16	0.044	2	SF3B5	TUBA4A+CD8+T cells C3
METTL9	0.00659256	0.749786	0.26	0.101	2	METTL9	TUBA4A+CD8+T cells C3
RCAN3	0.00663242	0.928312	0.12	0.025	2	RCAN3	TUBA4A+CD8+T cells C3
FBXO32	0.00703006	0.90828	0.2	0.069	2	FBXO32	TUBA4A+CD8+T cells C3
PAN3	0.00757034	1.05998	0.14	0.038	2	PAN3	TUBA4A+CD8+T cells C3
VPS4B	0.00825587	1.00783	0.1	0.019	2	VPS4B	TUBA4A+CD8+T cells C3
PRPF8	0.00845454	1.00407	0.1	0.019	2	PRPF8	TUBA4A+CD8+T cells C3
TMEM123	0.00857347	0.991314	0.2	0.069	2	TMEM123	TUBA4A+CD8+T cells C3
SSNA1	0.00886476	0.826355	0.1	0.019	2	SSNA1	TUBA4A+CD8+T cells C3
AGPAT2	0.00907646	0.82614	0.1	0.019	2	AGPAT2	TUBA4A+CD8+T cells C3
DDOST	0.00929266	1.02118	0.1	0.019	2	DDOST	TUBA4A+CD8+T cells C3
SPARCL1	0.00929266	0.872133	0.1	0.019	2	SPARCL1	TUBA4A+CD8+T cells C3
PLS3	0.00929266	0.840799	0.1	0.019	2	PLS3	TUBA4A+CD8+T cells C3
CSAD	0.0097389	0.579925	0.1	0.019	2	CSAD	TUBA4A+CD8+T cells C3
DUSP23	0.0099691	0.672243	0.1	0.019	2	DUSP23	TUBA4A+CD8+T cells C3
TUBA1A	3.33378e-29	3.48167	0.771	0.037	3	TUBA1A	TUBA1A+CD8+T cells C4
DYNLL1	4.0088e-09	2.38639	0.354	0.05	3	DYNLL1	TUBA1A+CD8+T cells C4
SDHAF3	0.000401284	1.19529	0.104	0.006	3	SDHAF3	TUBA1A+CD8+T cells C4
NOP53	0.000564478	0.882456	0.521	0.273	3	NOP53	TUBA1A+CD8+T cells C4
CACYBP	0.000694415	1.24464	0.25	0.075	3	CACYBP	TUBA1A+CD8+T cells C4
BTN3A3	0.00162985	1.03084	0.125	0.019	3	BTN3A3	TUBA1A+CD8+T cells C4
MBD4	0.00207271	1.01862	0.104	0.012	3	MBD4	TUBA1A+CD8+T cells C4
KLHDC2	0.00259897	0.993337	0.188	0.05	3	KLHDC2	TUBA1A+CD8+T cells C4
ILF3-DT	0.00317012	0.984081	0.146	0.031	3	ILF3-DT	TUBA1A+CD8+T cells C4
TSC22D3	0.00335904	0.555468	0.979	0.95	3	TSC22D3	TUBA1A+CD8+T cells C4
SNRPD3	0.0037254	1.08435	0.125	0.025	3	SNRPD3	TUBA1A+CD8+T cells C4
BZW1	0.00376584	1.42432	0.208	0.075	3	BZW1	TUBA1A+CD8+T cells C4
JUN	0.00385577	0.66093	0.833	0.814	3	JUN	TUBA1A+CD8+T cells C4
CDKN1B	0.00389643	1.23257	0.188	0.056	3	CDKN1B	TUBA1A+CD8+T cells C4
GATA3	0.00418231	1.12977	0.188	0.056	3	GATA3	TUBA1A+CD8+T cells C4
AL662844.4	0.00469864	1.04832	0.125	0.025	3	AL662844.4	TUBA1A+CD8+T cells C4
ZFAND5	0.0051839	0.801066	0.167	0.043	3	ZFAND5	TUBA1A+CD8+T cells C4
DAZAP1	0.00605963	1.00878	0.104	0.019	3	DAZAP1	TUBA1A+CD8+T cells C4
MRPL54	0.00669159	1.20186	0.104	0.019	3	MRPL54	TUBA1A+CD8+T cells C4
MIF	0.00685856	0.940521	0.104	0.019	3	MIF	TUBA1A+CD8+T cells C4
NDUFV2	0.00702301	0.83916	0.146	0.037	3	NDUFV2	TUBA1A+CD8+T cells C4
NANS	0.00702927	0.920526	0.104	0.019	3	NANS	TUBA1A+CD8+T cells C4
UHRF2	0.00756452	0.883542	0.104	0.019	3	UHRF2	TUBA1A+CD8+T cells C4
RPS19BP1	0.00756452	0.817637	0.104	0.019	3	RPS19BP1	TUBA1A+CD8+T cells C4

## Sheet: Supplementary Table 5
Supplementary Table 5. Differentially expressed genes (DEGs) in each aggrephagy subtype.
gene			gene				gene
DYNC1I2	DYNC1I2+CAF-C1		VIM	VIM+CD8+T_cells-C1			VIM	VIM+Mac-C1
TUBA1A	DYNC1I2+CAF-C1		NT5C3B	VIM+CD8+T_cells-C1			MT-ND5	VIM+Mac-C1
SPSB1	DYNC1I2+CAF-C1		PCM1	VIM+CD8+T_cells-C1			MT-ND4	VIM+Mac-C1
ASPN	DYNC1I2+CAF-C1		MLLT6	VIM+CD8+T_cells-C1			MT-ATP6	VIM+Mac-C1
SYNCRIP	DYNC1I2+CAF-C1		IMMT	VIM+CD8+T_cells-C1			EEF2	VIM+Mac-C1
RCN2	DYNC1I2+CAF-C1		SELL	VIM+CD8+T_cells-C1			LYZ	VIM+Mac-C1
JTB	DYNC1I2+CAF-C1		SLC9A3R1	VIM+CD8+T_cells-C1			DSG2	VIM+Mac-C1
DEGS1	DYNC1I2+CAF-C1		TXNDC17	VIM+CD8+T_cells-C1			C11orf96	VIM+Mac-C1
VCP	DYNC1I2+CAF-C1		SERINC5	VIM+CD8+T_cells-C1			TOX4	VIM+Mac-C1
MAP4K5	DYNC1I2+CAF-C1		CEBPZ	VIM+CD8+T_cells-C1			PARK7	PARK7+Mac-C2
GEM	DYNC1I2+CAF-C1		EMC3	VIM+CD8+T_cells-C1			DGCR6L	PARK7+Mac-C2
CNN3	DYNC1I2+CAF-C1		RBM26	VIM+CD8+T_cells-C1			TSTD1	PARK7+Mac-C2
COL4A2	DYNC1I2+CAF-C1		PEPD	VIM+CD8+T_cells-C1			TMEM9	PARK7+Mac-C2
LUZP2	DYNC1I2+CAF-C1		CD2	VIM+CD8+T_cells-C1			PSMA4	PARK7+Mac-C2
COL4A1	DYNC1I2+CAF-C1		PCBP1	VIM+CD8+T_cells-C1			PSMB3	PARK7+Mac-C2
COL3A1	DYNC1I2+CAF-C1		HLA-DQB1	VIM+CD8+T_cells-C1			SMIM4	PARK7+Mac-C2
SERPINE1	DYNC1I2+CAF-C1		LCP1	VIM+CD8+T_cells-C1			CFAP298	PARK7+Mac-C2
COL8A1	DYNC1I2+CAF-C1		SPINK1	VIM+CD8+T_cells-C1			PSENEN	PARK7+Mac-C2
MLEC	DYNC1I2+CAF-C1		UBA52	UBA52+CD8+T_cells-C2			CMTM6	PARK7+Mac-C2
LTBP1	DYNC1I2+CAF-C1		SSBP1	UBA52+CD8+T_cells-C2			MCUR1	PARK7+Mac-C2
COL5A1	DYNC1I2+CAF-C1		NSD1	UBA52+CD8+T_cells-C2			TUBA4A	PARK7+Mac-C2
GOLGA2	DYNC1I2+CAF-C1		RETREG3	UBA52+CD8+T_cells-C2			FH	PARK7+Mac-C2
HDAC2	DYNC1I2+CAF-C1		RBX1	UBA52+CD8+T_cells-C2			NARS2	PARK7+Mac-C2
TPM4	DYNC1I2+CAF-C1		GLUD1	UBA52+CD8+T_cells-C2			CRTAP	PARK7+Mac-C2
IPO7	DYNC1I2+CAF-C1		AURKAIP1	UBA52+CD8+T_cells-C2			DYNLL2	PARK7+Mac-C2
FKBP9	DYNC1I2+CAF-C1		PRKAA1	UBA52+CD8+T_cells-C2			TMEM92	PARK7+Mac-C2
MAGED2	DYNC1I2+CAF-C1		RPL18	UBA52+CD8+T_cells-C2			PPIE	PARK7+Mac-C2
EPHA3	DYNC1I2+CAF-C1		SNRPG	UBA52+CD8+T_cells-C2			PSMC4	PARK7+Mac-C2
NOTCH3	DYNC1I2+CAF-C1		RPS15	UBA52+CD8+T_cells-C2			NRGN	PARK7+Mac-C2
CTHRC1	DYNC1I2+CAF-C1		RPL27A	UBA52+CD8+T_cells-C2			YWHAQ	PARK7+Mac-C2
TUBA1B	DYNC1I2+CAF-C1		UQCRFS1	UBA52+CD8+T_cells-C2			SEMA4A	PARK7+Mac-C2
PSMD11	DYNC1I2+CAF-C1		GNPAT	UBA52+CD8+T_cells-C2			LSM4	PARK7+Mac-C2
MTDH	DYNC1I2+CAF-C1		IFI27L2	UBA52+CD8+T_cells-C2			QKI	PARK7+Mac-C2
SPPL2A	DYNC1I2+CAF-C1		ASPH	UBA52+CD8+T_cells-C2			SLC35C2	PARK7+Mac-C2
RSF1	DYNC1I2+CAF-C1		DCTD	UBA52+CD8+T_cells-C2			SMIM19	PARK7+Mac-C2
FHL2	DYNC1I2+CAF-C1		RPS27A	UBA52+CD8+T_cells-C2			DNPH1	PARK7+Mac-C2
PHLDA3	DYNC1I2+CAF-C1		RPS7	UBA52+CD8+T_cells-C2			HIST1H1C	PARK7+Mac-C2
EPDR1	DYNC1I2+CAF-C1		TUBB	UBA52+CD8+T_cells-C2			CALM2	PARK7+Mac-C2
GTF3C6	DYNC1I2+CAF-C1		CCT4	UBA52+CD8+T_cells-C2			SERINC3	PARK7+Mac-C2
PRKAR1A	DYNC1I2+CAF-C1		RPL26	UBA52+CD8+T_cells-C2			NUCB2	PARK7+Mac-C2
FNTA	DYNC1I2+CAF-C1		TSC22D1	UBA52+CD8+T_cells-C2			GJA1	PARK7+Mac-C2
ATG3	DYNC1I2+CAF-C1		CCNC	UBA52+CD8+T_cells-C2			MTIF3	PARK7+Mac-C2
F2R	DYNC1I2+CAF-C1		TALDO1	UBA52+CD8+T_cells-C2			DESI2	PARK7+Mac-C2
NFKBIZ	DYNC1I2+CAF-C1		NCKAP1L	UBA52+CD8+T_cells-C2			NDUFB2	PARK7+Mac-C2
ELN	DYNC1I2+CAF-C1		VOPP1	UBA52+CD8+T_cells-C2			CDK4	PARK7+Mac-C2
HES4	DYNC1I2+CAF-C1		MPC2	UBA52+CD8+T_cells-C2			CYC1	PARK7+Mac-C2
FBXW11	DYNC1I2+CAF-C1		DPY30	UBA52+CD8+T_cells-C2			NDUFA4	PARK7+Mac-C2
TUBB	DYNC1I2+CAF-C1		ABHD17A	UBA52+CD8+T_cells-C2			UQCRB	PARK7+Mac-C2
CTBP2	DYNC1I2+CAF-C1		POLR1D	UBA52+CD8+T_cells-C2			GPRC5C	PARK7+Mac-C2
COL10A1	DYNC1I2+CAF-C1		NKG7	UBA52+CD8+T_cells-C2			C21orf2	PARK7+Mac-C2
CANX	DYNC1I2+CAF-C1		RPS8	UBA52+CD8+T_cells-C2			RAB11B	PARK7+Mac-C2
AKR1A1	DYNC1I2+CAF-C1		MINOS1	UBA52+CD8+T_cells-C2			PLPP5	PARK7+Mac-C2
OS9	DYNC1I2+CAF-C1		LRCH4	UBA52+CD8+T_cells-C2			TIMM10B	PARK7+Mac-C2
PLEKHA1	DYNC1I2+CAF-C1		CORO1B	UBA52+CD8+T_cells-C2			MORN2	PARK7+Mac-C2
LDLRAD4	DYNC1I2+CAF-C1		IDI1	UBA52+CD8+T_cells-C2			UBLCP1	PARK7+Mac-C2
CIR1	DYNC1I2+CAF-C1		TUBA4A	TUBA4A+CD8+T_cells-C3			TMEM129	PARK7+Mac-C2
BGN	DYNC1I2+CAF-C1		TUBA1B	TUBA4A+CD8+T_cells-C3			RAN	PARK7+Mac-C2
PPP2CA	DYNC1I2+CAF-C1		RAB5B	TUBA4A+CD8+T_cells-C3			EIF3F	PARK7+Mac-C2
PDLIM3	DYNC1I2+CAF-C1		ZBTB24	TUBA4A+CD8+T_cells-C3			TAOK3	PARK7+Mac-C2
COL1A2	DYNC1I2+CAF-C1		PIM2	TUBA4A+CD8+T_cells-C3			RAP1A	PARK7+Mac-C2
ARCN1	DYNC1I2+CAF-C1		BEX3	TUBA4A+CD8+T_cells-C3			HMGCL	PARK7+Mac-C2
COL1A1	DYNC1I2+CAF-C1		DRAM2	TUBA4A+CD8+T_cells-C3			ATXN2	PARK7+Mac-C2
UBE2N	DYNC1I2+CAF-C1		PCNA	TUBA4A+CD8+T_cells-C3			EIF5A	PARK7+Mac-C2
SOCS5	DYNC1I2+CAF-C1		RNF11	TUBA4A+CD8+T_cells-C3			HADHB	PARK7+Mac-C2
CALCOCO2	DYNC1I2+CAF-C1		RALGAPA1	TUBA4A+CD8+T_cells-C3			PFN1	PARK7+Mac-C2
RB1CC1	DYNC1I2+CAF-C1		CCSER2	TUBA4A+CD8+T_cells-C3			HMOX1	PARK7+Mac-C2
VCAN	DYNC1I2+CAF-C1		IRF7	TUBA4A+CD8+T_cells-C3			MRPL42	PARK7+Mac-C2
PRSS23	DYNC1I2+CAF-C1		DECR1	TUBA4A+CD8+T_cells-C3			CDK2AP2	PARK7+Mac-C2
TNFRSF19	DYNC1I2+CAF-C1		DBI	TUBA4A+CD8+T_cells-C3			MAGED1	PARK7+Mac-C2
CHD9	DYNC1I2+CAF-C1		CAPZA2	TUBA4A+CD8+T_cells-C3			P3H2	PARK7+Mac-C2
CLIC1	DYNC1I2+CAF-C1		MT1X	TUBA4A+CD8+T_cells-C3			MLF2	PARK7+Mac-C2
FBN1	DYNC1I2+CAF-C1		ANXA5	TUBA4A+CD8+T_cells-C3			ARPC3	PARK7+Mac-C2
COL21A1	DYNC1I2+CAF-C1		SAR1B	TUBA4A+CD8+T_cells-C3			PSMA5	PARK7+Mac-C2
APOL1	DYNC1I2+CAF-C1		MDH2	TUBA4A+CD8+T_cells-C3			HDDC2	PARK7+Mac-C2
RNF11	DYNC1I2+CAF-C1		PTGER4	TUBA4A+CD8+T_cells-C3			NT5DC1	PARK7+Mac-C2
ZC3H15	DYNC1I2+CAF-C1		COTL1	TUBA4A+CD8+T_cells-C3			ADGRD1	PARK7+Mac-C2
COL5A2	DYNC1I2+CAF-C1		ROCK1	TUBA4A+CD8+T_cells-C3			CAPRIN1	PARK7+Mac-C2
TPST2	DYNC1I2+CAF-C1		DDB2	TUBA4A+CD8+T_cells-C3			MT1X	PARK7+Mac-C2
ILK	DYNC1I2+CAF-C1		XPC	TUBA4A+CD8+T_cells-C3			ENY2	PARK7+Mac-C2
AP2M1	DYNC1I2+CAF-C1		RFFL	TUBA4A+CD8+T_cells-C3			ANXA7	PARK7+Mac-C2
PRNP	DYNC1I2+CAF-C1		TECR	TUBA4A+CD8+T_cells-C3			ZNF593	PARK7+Mac-C2
YIPF5	DYNC1I2+CAF-C1		PPM1A	TUBA4A+CD8+T_cells-C3			HIP1R	PARK7+Mac-C2
COL6A2	DYNC1I2+CAF-C1		BPGM	TUBA4A+CD8+T_cells-C3			MRPS26	PARK7+Mac-C2
SERPINE2	DYNC1I2+CAF-C1		HNRNPA0	TUBA4A+CD8+T_cells-C3			MRPL52	PARK7+Mac-C2
EFEMP1	DYNC1I2+CAF-C1		PPP1R12A	TUBA4A+CD8+T_cells-C3			CIB1	PARK7+Mac-C2
RRBP1	DYNC1I2+CAF-C1		KRT10	TUBA4A+CD8+T_cells-C3			GCN1	PARK7+Mac-C2
DHX9	DYNC1I2+CAF-C1		ASCC2	TUBA4A+CD8+T_cells-C3			SNF8	PARK7+Mac-C2
ACTB	DYNC1I2+CAF-C1		SF3B5	TUBA4A+CD8+T_cells-C3			ME2	PARK7+Mac-C2
MEAF6	DYNC1I2+CAF-C1		METTL9	TUBA4A+CD8+T_cells-C3			SELENOM	PARK7+Mac-C2
FSTL1	DYNC1I2+CAF-C1		RCAN3	TUBA4A+CD8+T_cells-C3			ST3GAL5	PARK7+Mac-C2
ATP6AP1	DYNC1I2+CAF-C1		FBXO32	TUBA4A+CD8+T_cells-C3			COX7A2	PARK7+Mac-C2
PLS3	DYNC1I2+CAF-C1		PAN3	TUBA4A+CD8+T_cells-C3			BLVRB	PARK7+Mac-C2
TAGLN	DYNC1I2+CAF-C1		VPS4B	TUBA4A+CD8+T_cells-C3			CTSD	PARK7+Mac-C2
CCDC146	DYNC1I2+CAF-C1		PRPF8	TUBA4A+CD8+T_cells-C3			IFT57	PARK7+Mac-C2
TGFB1	DYNC1I2+CAF-C1		TMEM123	TUBA4A+CD8+T_cells-C3			IGF2R	PARK7+Mac-C2
PSMD4	DYNC1I2+CAF-C1		SSNA1	TUBA4A+CD8+T_cells-C3			CHCHD2	PARK7+Mac-C2
TMBIM1	DYNC1I2+CAF-C1		AGPAT2	TUBA4A+CD8+T_cells-C3			UBE2S	PARK7+Mac-C2
EXOC5	DYNC1I2+CAF-C1		DDOST	TUBA4A+CD8+T_cells-C3			CHMP7	PARK7+Mac-C2
IMP4	DYNC1I2+CAF-C1		SPARCL1	TUBA4A+CD8+T_cells-C3			PIGF	PARK7+Mac-C2
KLHDC2	DYNC1I2+CAF-C1		PLS3	TUBA4A+CD8+T_cells-C3			TRPT1	PARK7+Mac-C2
SULF1	DYNC1I2+CAF-C1		CSAD	TUBA4A+CD8+T_cells-C3			CGGBP1	PARK7+Mac-C2
EIF4A3	DYNC1I2+CAF-C1		DUSP23	TUBA4A+CD8+T_cells-C3			FNIP1	PARK7+Mac-C2
TNIP1	DYNC1I2+CAF-C1		TUBA1A	TUBA1A+CD8+T_cells-C4			ZNF511	PARK7+Mac-C2
SPON2	DYNC1I2+CAF-C1		DYNLL1	TUBA1A+CD8+T_cells-C4			PSMA2	PARK7+Mac-C2
TMEM181	DYNC1I2+CAF-C1		SDHAF3	TUBA1A+CD8+T_cells-C4			MGLL	PARK7+Mac-C2
FAM177A1	DYNC1I2+CAF-C1		NOP53	TUBA1A+CD8+T_cells-C4
C11orf96	DYNC1I2+CAF-C1		CACYBP	TUBA1A+CD8+T_cells-C4
EIF4E	DYNC1I2+CAF-C1		BTN3A3	TUBA1A+CD8+T_cells-C4
PBX1	DYNC1I2+CAF-C1		MBD4	TUBA1A+CD8+T_cells-C4
USP11	DYNC1I2+CAF-C1		KLHDC2	TUBA1A+CD8+T_cells-C4
KLF10	DYNC1I2+CAF-C1		ILF3-DT	TUBA1A+CD8+T_cells-C4
IMP3	DYNC1I2+CAF-C1		TSC22D3	TUBA1A+CD8+T_cells-C4
ID4	DYNC1I2+CAF-C1		SNRPD3	TUBA1A+CD8+T_cells-C4
TGFBI	DYNC1I2+CAF-C1		BZW1	TUBA1A+CD8+T_cells-C4
ITGA11	DYNC1I2+CAF-C1		JUN	TUBA1A+CD8+T_cells-C4
PACSIN2	DYNC1I2+CAF-C1		CDKN1B	TUBA1A+CD8+T_cells-C4
GPS1	DYNC1I2+CAF-C1		GATA3	TUBA1A+CD8+T_cells-C4
TPM2	DYNC1I2+CAF-C1		AL662844.4	TUBA1A+CD8+T_cells-C4
FHL1	DYNC1I2+CAF-C1		ZFAND5	TUBA1A+CD8+T_cells-C4
CTGF	DYNC1I2+CAF-C1		DAZAP1	TUBA1A+CD8+T_cells-C4
SCG2	DYNC1I2+CAF-C1		MRPL54	TUBA1A+CD8+T_cells-C4
DERL1	DYNC1I2+CAF-C1		MIF	TUBA1A+CD8+T_cells-C4
HTRA3	DYNC1I2+CAF-C1		NDUFV2	TUBA1A+CD8+T_cells-C4
ANKRD11	DYNC1I2+CAF-C1		NANS	TUBA1A+CD8+T_cells-C4
FAM217B	DYNC1I2+CAF-C1		UHRF2	TUBA1A+CD8+T_cells-C4
POSTN	DYNC1I2+CAF-C1		RPS19BP1	TUBA1A+CD8+T_cells-C4
COL6A3	DYNC1I2+CAF-C1
ANGEL2	DYNC1I2+CAF-C1
CALM2	DYNC1I2+CAF-C1
SPIDR	DYNC1I2+CAF-C1
DIO2	DYNC1I2+CAF-C1
C1orf198	DYNC1I2+CAF-C1
ACTA2	DYNC1I2+CAF-C1
NGRN	DYNC1I2+CAF-C1
MYL9	DYNC1I2+CAF-C1
VCAM1	DYNC1I2+CAF-C1
PARK7	DYNLL1+CAF-C2
DYNLL1	DYNLL1+CAF-C2
RPL26	DYNLL1+CAF-C2
RPL37	DYNLL1+CAF-C2
RPS23	DYNLL1+CAF-C2
RPL17	DYNLL1+CAF-C2
RPS12	DYNLL1+CAF-C2
RPLP1	DYNLL1+CAF-C2
RPS13	DYNLL1+CAF-C2
DDT	DYNLL1+CAF-C2
RPL14	DYNLL1+CAF-C2
TPT1	DYNLL1+CAF-C2
NDUFA12	DYNLL1+CAF-C2
RPL12	DYNLL1+CAF-C2
MRPL51	DYNLL1+CAF-C2
MIF	DYNLL1+CAF-C2
PRRX1	DYNLL1+CAF-C2
RPS10	DYNLL1+CAF-C2
CAMK2N1	DYNLL1+CAF-C2
RPL39	DYNLL1+CAF-C2
SDE2	DYNLL1+CAF-C2
DNAJC15	DYNLL1+CAF-C2
RPS27	DYNLL1+CAF-C2
RPS11	DYNLL1+CAF-C2
NDUFS6	DYNLL1+CAF-C2
BRI3	DYNLL1+CAF-C2
NDUFA13	DYNLL1+CAF-C2
S100A13	DYNLL1+CAF-C2
BLOC1S4	DYNLL1+CAF-C2
RPS27A	DYNLL1+CAF-C2
TRIM44	DYNLL1+CAF-C2
SNHG8	DYNLL1+CAF-C2
IGHG1	DYNLL1+CAF-C2
RPS21	DYNLL1+CAF-C2
C1orf122	DYNLL1+CAF-C2
FXYD1	DYNLL1+CAF-C2
SFRP1	DYNLL1+CAF-C2
CEBPB	DYNLL1+CAF-C2
RPL36AL	DYNLL1+CAF-C2
XPA	DYNLL1+CAF-C2
TOMM7	DYNLL1+CAF-C2
MGP	DYNLL1+CAF-C2
RARRES1	DYNLL1+CAF-C2
VGLL3	DYNLL1+CAF-C2
PTMS	DYNLL1+CAF-C2
RPS27L	DYNLL1+CAF-C2
NDUFA8	DYNLL1+CAF-C2
MAML2	DYNLL1+CAF-C2
GAS1	DYNLL1+CAF-C2
UQCR10	DYNLL1+CAF-C2
COX7C	DYNLL1+CAF-C2
SELENOM	DYNLL1+CAF-C2
SYNPO2	DYNLL1+CAF-C2
UQCRB	DYNLL1+CAF-C2
MIR4435-2HG	DYNLL1+CAF-C2
CCDC80	DYNLL1+CAF-C2
LEPR	DYNLL1+CAF-C2
LMO4	DYNLL1+CAF-C2
C3	DYNLL1+CAF-C2
TMEM214	DYNLL1+CAF-C2
PPP1R14A	DYNLL1+CAF-C2
AC020656.1	DYNLL1+CAF-C2
CLMP	DYNLL1+CAF-C2
PIK3R1	DYNLL1+CAF-C2
PRDX1	DYNLL1+CAF-C2
NES	DYNLL1+CAF-C2
CEBPD	DYNLL1+CAF-C2
MT-ND6	DYNLL1+CAF-C2
TXNIP	DYNLL1+CAF-C2
RAPGEF5	DYNLL1+CAF-C2
USP53	DYNLL1+CAF-C2
PLEKHA2	DYNLL1+CAF-C2
ZDBF2	DYNLL1+CAF-C2
VEGFB	DYNLL1+CAF-C2
DYNLT1	DYNLL1+CAF-C2
RND3	DYNLL1+CAF-C2
CBX3	DYNLL1+CAF-C2
PITPNA	DYNLL1+CAF-C2
IGHG3	DYNLL1+CAF-C2
HSPE1	DYNLL1+CAF-C2
CMC1	DYNLL1+CAF-C2
PLA2G2A	DYNLL1+CAF-C2
SUGCT	DYNLL1+CAF-C2
MITD1	DYNLL1+CAF-C2
NDUFB11	DYNLL1+CAF-C2
SFRP2	DYNLL1+CAF-C2
IGFBP4	DYNLL1+CAF-C2
PARK7	PARK7+CAF-C3
UBB	PARK7+CAF-C3
ZFAND6	PARK7+CAF-C3
PGAM1	PARK7+CAF-C3
PI4KB	PARK7+CAF-C3
SCAPER	PARK7+CAF-C3
LMCD1	PARK7+CAF-C3
RASL11B	PARK7+CAF-C3
FOLR2	PARK7+CAF-C3
RRAGA	PARK7+CAF-C3
RCN3	PARK7+CAF-C3
MORF4L2	PARK7+CAF-C3
HNRNPF	PARK7+CAF-C3
WFS1	PARK7+CAF-C3
PSMC5	PARK7+CAF-C3
CDC37	PARK7+CAF-C3
MLLT11	PARK7+CAF-C3
ANAPC7	PARK7+CAF-C3
DCAF12	PARK7+CAF-C3
WASHC1	PARK7+CAF-C3
EIF2A	PARK7+CAF-C3
NTMT1	PARK7+CAF-C3
COQ8A	PARK7+CAF-C3
NDFIP1	PARK7+CAF-C3
CLEC11A	PARK7+CAF-C3
CHID1	PARK7+CAF-C3
KDELR2	PARK7+CAF-C3
CIB1	PARK7+CAF-C3
DKK3	PARK7+CAF-C3
SCAND1	PARK7+CAF-C3
NEU1	PARK7+CAF-C3
MFAP4	PARK7+CAF-C3
TMEM115	PARK7+CAF-C3
TVP23B	PARK7+CAF-C3
PSMF1	PARK7+CAF-C3
ETS2	PARK7+CAF-C3
DHPS	PARK7+CAF-C3
BEX3	PARK7+CAF-C3
CALM2	PARK7+CAF-C3
CCT6A	PARK7+CAF-C3
NMD3	PARK7+CAF-C3
LAPTM4A	PARK7+CAF-C3
ARHGDIA	PARK7+CAF-C3
PLPP3	PARK7+CAF-C3
TNFRSF12A	PARK7+CAF-C3
TUBA1B	PARK7+CAF-C3
KCNS3	PARK7+CAF-C3
FYTTD1	PARK7+CAF-C3
VSNL1	PARK7+CAF-C3
OAZ2	PARK7+CAF-C3
CREB1	PARK7+CAF-C3
NMRAL1	PARK7+CAF-C3
MAP2K7	PARK7+CAF-C3
RSL1D1	PARK7+CAF-C3
H2AFJ	PARK7+CAF-C3
RNPEP	PARK7+CAF-C3
HSPA8	PARK7+CAF-C3
TSPAN6	PARK7+CAF-C3
PSMC2	PARK7+CAF-C3
RAB5C	PARK7+CAF-C3
CTSF	PARK7+CAF-C3
FBLN5	PARK7+CAF-C3
FKBP10	PARK7+CAF-C3
PCNP	PARK7+CAF-C3
AXL	PARK7+CAF-C3
GAPDH	PARK7+CAF-C3
ERH	PARK7+CAF-C3
RELA	PARK7+CAF-C3
AP2M1	PARK7+CAF-C3
E4F1	PARK7+CAF-C3
EIF4A3	PARK7+CAF-C3
AEBP2	PARK7+CAF-C3
LRPAP1	PARK7+CAF-C3
GRB2	PARK7+CAF-C3
DPM3	PARK7+CAF-C3
PSMD3	PARK7+CAF-C3
SEC13	PARK7+CAF-C3
NSMCE3	PARK7+CAF-C3
HSP90AB1	PARK7+CAF-C3
HPS5	PARK7+CAF-C3
TTC1	PARK7+CAF-C3
FIBIN	PARK7+CAF-C3
PPP1CB	PARK7+CAF-C3
SLC25A6	PARK7+CAF-C3
SLC41A3	PARK7+CAF-C3
TFG	PARK7+CAF-C3
DNASE2	PARK7+CAF-C3
NET1	PARK7+CAF-C3
TSC22D1	PARK7+CAF-C3
KDELR3	PARK7+CAF-C3
MT1E	PARK7+CAF-C3
GADD45B	PARK7+CAF-C3
RAB7A	PARK7+CAF-C3
NUCB2	PARK7+CAF-C3
SRSF2	PARK7+CAF-C3
NABP2	PARK7+CAF-C3
TRA2B	PARK7+CAF-C3
UBE2D3	PARK7+CAF-C3
CDKN2C	PARK7+CAF-C3
ATP6V1E1	PARK7+CAF-C3
NDN	PARK7+CAF-C3
GPKOW	PARK7+CAF-C3
TSPAN13	PARK7+CAF-C3
WDR83OS	PARK7+CAF-C3
TSPAN4	PARK7+CAF-C3
CHMP3	PARK7+CAF-C3
TUFM	PARK7+CAF-C3
NXT1	PARK7+CAF-C3
DPT	PARK7+CAF-C3
WNT5A	PARK7+CAF-C3
FHL1	PARK7+CAF-C3
ABHD14A	PARK7+CAF-C3
MXRA8	PARK7+CAF-C3
ERI3	PARK7+CAF-C3
CUTA	PARK7+CAF-C3
TPRA1	PARK7+CAF-C3
CNN3	PARK7+CAF-C3

## Sheet: Supplementary Table 8
Supplementary Table 8. A total of 571 genes form aggrephagy-related subtypes.
Aggre_celltype	marker
DYNC1I2+CAF-C1	DYNC1I2
DYNC1I2+CAF-C1	TUBA1A
DYNC1I2+CAF-C1	SPSB1
DYNC1I2+CAF-C1	ASPN
DYNC1I2+CAF-C1	SYNCRIP
DYNC1I2+CAF-C1	RCN2
DYNC1I2+CAF-C1	JTB
DYNC1I2+CAF-C1	DEGS1
DYNC1I2+CAF-C1	VCP
DYNC1I2+CAF-C1	MAP4K5
DYNC1I2+CAF-C1	GEM
DYNC1I2+CAF-C1	CNN3
DYNC1I2+CAF-C1	COL4A2
DYNC1I2+CAF-C1	LUZP2
DYNC1I2+CAF-C1	COL4A1
DYNC1I2+CAF-C1	COL3A1
DYNC1I2+CAF-C1	SERPINE1
DYNC1I2+CAF-C1	COL8A1
DYNC1I2+CAF-C1	MLEC
DYNC1I2+CAF-C1	LTBP1
DYNC1I2+CAF-C1	COL5A1
DYNC1I2+CAF-C1	GOLGA2
DYNC1I2+CAF-C1	HDAC2
DYNC1I2+CAF-C1	TPM4
DYNC1I2+CAF-C1	IPO7
DYNC1I2+CAF-C1	FKBP9
DYNC1I2+CAF-C1	MAGED2
DYNC1I2+CAF-C1	EPHA3
DYNC1I2+CAF-C1	NOTCH3
DYNC1I2+CAF-C1	CTHRC1
DYNC1I2+CAF-C1	TUBA1B
DYNC1I2+CAF-C1	PSMD11
DYNC1I2+CAF-C1	MTDH
DYNC1I2+CAF-C1	SPPL2A
DYNC1I2+CAF-C1	RSF1
DYNC1I2+CAF-C1	FHL2
DYNC1I2+CAF-C1	PHLDA3
DYNC1I2+CAF-C1	EPDR1
DYNC1I2+CAF-C1	GTF3C6
DYNC1I2+CAF-C1	PRKAR1A
DYNC1I2+CAF-C1	FNTA
DYNC1I2+CAF-C1	ATG3
DYNC1I2+CAF-C1	F2R
DYNC1I2+CAF-C1	NFKBIZ
DYNC1I2+CAF-C1	ELN
DYNC1I2+CAF-C1	HES4
DYNC1I2+CAF-C1	FBXW11
DYNC1I2+CAF-C1	TUBB
DYNC1I2+CAF-C1	CTBP2
DYNC1I2+CAF-C1	COL10A1
DYNC1I2+CAF-C1	CANX
DYNC1I2+CAF-C1	AKR1A1
DYNC1I2+CAF-C1	OS9
DYNC1I2+CAF-C1	PLEKHA1
DYNC1I2+CAF-C1	LDLRAD4
DYNC1I2+CAF-C1	CIR1
DYNC1I2+CAF-C1	BGN
DYNC1I2+CAF-C1	PPP2CA
DYNC1I2+CAF-C1	PDLIM3
DYNC1I2+CAF-C1	COL1A2
DYNC1I2+CAF-C1	ARCN1
DYNC1I2+CAF-C1	COL1A1
DYNC1I2+CAF-C1	UBE2N
DYNC1I2+CAF-C1	SOCS5
DYNC1I2+CAF-C1	CALCOCO2
DYNC1I2+CAF-C1	RB1CC1
DYNC1I2+CAF-C1	VCAN
DYNC1I2+CAF-C1	PRSS23
DYNC1I2+CAF-C1	TNFRSF19
DYNC1I2+CAF-C1	CHD9
DYNC1I2+CAF-C1	CLIC1
DYNC1I2+CAF-C1	FBN1
DYNC1I2+CAF-C1	COL21A1
DYNC1I2+CAF-C1	APOL1
DYNC1I2+CAF-C1	RNF11
DYNC1I2+CAF-C1	ZC3H15
DYNC1I2+CAF-C1	COL5A2
DYNC1I2+CAF-C1	TPST2
DYNC1I2+CAF-C1	ILK
DYNC1I2+CAF-C1	AP2M1
DYNC1I2+CAF-C1	PRNP
DYNC1I2+CAF-C1	YIPF5
DYNC1I2+CAF-C1	COL6A2
DYNC1I2+CAF-C1	SERPINE2
DYNC1I2+CAF-C1	EFEMP1
DYNC1I2+CAF-C1	RRBP1
DYNC1I2+CAF-C1	DHX9
DYNC1I2+CAF-C1	ACTB
DYNC1I2+CAF-C1	MEAF6
DYNC1I2+CAF-C1	FSTL1
DYNC1I2+CAF-C1	ATP6AP1
DYNC1I2+CAF-C1	PLS3
DYNC1I2+CAF-C1	TAGLN
DYNC1I2+CAF-C1	CCDC146
DYNC1I2+CAF-C1	TGFB1
DYNC1I2+CAF-C1	PSMD4
DYNC1I2+CAF-C1	TMBIM1
DYNC1I2+CAF-C1	EXOC5
DYNC1I2+CAF-C1	IMP4
DYNC1I2+CAF-C1	KLHDC2
DYNC1I2+CAF-C1	SULF1
DYNC1I2+CAF-C1	EIF4A3
DYNC1I2+CAF-C1	TNIP1
DYNC1I2+CAF-C1	SPON2
DYNC1I2+CAF-C1	TMEM181
DYNC1I2+CAF-C1	FAM177A1
DYNC1I2+CAF-C1	C11orf96
DYNC1I2+CAF-C1	EIF4E
DYNC1I2+CAF-C1	PBX1
DYNC1I2+CAF-C1	USP11
DYNC1I2+CAF-C1	KLF10
DYNC1I2+CAF-C1	IMP3
DYNC1I2+CAF-C1	ID4
DYNC1I2+CAF-C1	TGFBI
DYNC1I2+CAF-C1	ITGA11
DYNC1I2+CAF-C1	PACSIN2
DYNC1I2+CAF-C1	GPS1
DYNC1I2+CAF-C1	TPM2
DYNC1I2+CAF-C1	FHL1
DYNC1I2+CAF-C1	CTGF
DYNC1I2+CAF-C1	SCG2
DYNC1I2+CAF-C1	DERL1
DYNC1I2+CAF-C1	HTRA3
DYNC1I2+CAF-C1	ANKRD11
DYNC1I2+CAF-C1	FAM217B
DYNC1I2+CAF-C1	POSTN
DYNC1I2+CAF-C1	COL6A3
DYNC1I2+CAF-C1	ANGEL2
DYNC1I2+CAF-C1	CALM2
DYNC1I2+CAF-C1	SPIDR
DYNC1I2+CAF-C1	DIO2
DYNC1I2+CAF-C1	C1orf198
DYNC1I2+CAF-C1	ACTA2
DYNC1I2+CAF-C1	NGRN
DYNC1I2+CAF-C1	MYL9
DYNC1I2+CAF-C1	VCAM1
DYNLL1+CAF-C2	PARK7
DYNLL1+CAF-C2	DYNLL1
DYNLL1+CAF-C2	RPL26
DYNLL1+CAF-C2	RPL37
DYNLL1+CAF-C2	RPS23
DYNLL1+CAF-C2	RPL17
DYNLL1+CAF-C2	RPS12
DYNLL1+CAF-C2	RPLP1
DYNLL1+CAF-C2	RPS13
DYNLL1+CAF-C2	DDT
DYNLL1+CAF-C2	RPL14
DYNLL1+CAF-C2	TPT1
DYNLL1+CAF-C2	NDUFA12
DYNLL1+CAF-C2	RPL12
DYNLL1+CAF-C2	MRPL51
DYNLL1+CAF-C2	MIF
DYNLL1+CAF-C2	PRRX1
DYNLL1+CAF-C2	RPS10
DYNLL1+CAF-C2	CAMK2N1
DYNLL1+CAF-C2	RPL39
DYNLL1+CAF-C2	SDE2
DYNLL1+CAF-C2	DNAJC15
DYNLL1+CAF-C2	RPS27
DYNLL1+CAF-C2	RPS11
DYNLL1+CAF-C2	NDUFS6
DYNLL1+CAF-C2	BRI3
DYNLL1+CAF-C2	NDUFA13
DYNLL1+CAF-C2	S100A13
DYNLL1+CAF-C2	BLOC1S4
DYNLL1+CAF-C2	RPS27A
DYNLL1+CAF-C2	TRIM44
DYNLL1+CAF-C2	SNHG8
DYNLL1+CAF-C2	IGHG1
DYNLL1+CAF-C2	RPS21
DYNLL1+CAF-C2	C1orf122
DYNLL1+CAF-C2	FXYD1
DYNLL1+CAF-C2	SFRP1
DYNLL1+CAF-C2	CEBPB
DYNLL1+CAF-C2	RPL36AL
DYNLL1+CAF-C2	XPA
DYNLL1+CAF-C2	TOMM7
DYNLL1+CAF-C2	MGP
DYNLL1+CAF-C2	RARRES1
DYNLL1+CAF-C2	VGLL3
DYNLL1+CAF-C2	PTMS
DYNLL1+CAF-C2	RPS27L
DYNLL1+CAF-C2	NDUFA8
DYNLL1+CAF-C2	MAML2
DYNLL1+CAF-C2	GAS1
DYNLL1+CAF-C2	UQCR10
DYNLL1+CAF-C2	COX7C
DYNLL1+CAF-C2	SELENOM
DYNLL1+CAF-C2	SYNPO2
DYNLL1+CAF-C2	UQCRB
DYNLL1+CAF-C2	MIR4435-2HG
DYNLL1+CAF-C2	CCDC80
DYNLL1+CAF-C2	LEPR
DYNLL1+CAF-C2	LMO4
DYNLL1+CAF-C2	C3
DYNLL1+CAF-C2	TMEM214
DYNLL1+CAF-C2	PPP1R14A
DYNLL1+CAF-C2	AC020656.1
DYNLL1+CAF-C2	CLMP
DYNLL1+CAF-C2	PIK3R1
DYNLL1+CAF-C2	PRDX1
DYNLL1+CAF-C2	NES
DYNLL1+CAF-C2	CEBPD
DYNLL1+CAF-C2	MT-ND6
DYNLL1+CAF-C2	TXNIP
DYNLL1+CAF-C2	RAPGEF5
DYNLL1+CAF-C2	USP53
DYNLL1+CAF-C2	PLEKHA2
DYNLL1+CAF-C2	ZDBF2
DYNLL1+CAF-C2	VEGFB
DYNLL1+CAF-C2	DYNLT1
DYNLL1+CAF-C2	RND3
DYNLL1+CAF-C2	CBX3
DYNLL1+CAF-C2	PITPNA
DYNLL1+CAF-C2	IGHG3
DYNLL1+CAF-C2	HSPE1
DYNLL1+CAF-C2	CMC1
DYNLL1+CAF-C2	PLA2G2A
DYNLL1+CAF-C2	SUGCT
DYNLL1+CAF-C2	MITD1
DYNLL1+CAF-C2	NDUFB11
DYNLL1+CAF-C2	SFRP2
DYNLL1+CAF-C2	IGFBP4
PARK7+CAF-C3	PARK7
PARK7+CAF-C3	UBB
PARK7+CAF-C3	ZFAND6
PARK7+CAF-C3	PGAM1
PARK7+CAF-C3	PI4KB
PARK7+CAF-C3	SCAPER
PARK7+CAF-C3	LMCD1
PARK7+CAF-C3	RASL11B
PARK7+CAF-C3	FOLR2
PARK7+CAF-C3	RRAGA
PARK7+CAF-C3	RCN3
PARK7+CAF-C3	MORF4L2
PARK7+CAF-C3	HNRNPF
PARK7+CAF-C3	WFS1
PARK7+CAF-C3	PSMC5
PARK7+CAF-C3	CDC37
PARK7+CAF-C3	MLLT11
PARK7+CAF-C3	ANAPC7
PARK7+CAF-C3	DCAF12
PARK7+CAF-C3	WASHC1
PARK7+CAF-C3	EIF2A
PARK7+CAF-C3	NTMT1
PARK7+CAF-C3	COQ8A
PARK7+CAF-C3	NDFIP1
PARK7+CAF-C3	CLEC11A
PARK7+CAF-C3	CHID1
PARK7+CAF-C3	KDELR2
PARK7+CAF-C3	CIB1
PARK7+CAF-C3	DKK3
PARK7+CAF-C3	SCAND1
PARK7+CAF-C3	NEU1
PARK7+CAF-C3	MFAP4
PARK7+CAF-C3	TMEM115
PARK7+CAF-C3	TVP23B
PARK7+CAF-C3	PSMF1
PARK7+CAF-C3	ETS2
PARK7+CAF-C3	DHPS
PARK7+CAF-C3	BEX3
PARK7+CAF-C3	CALM2
PARK7+CAF-C3	CCT6A
PARK7+CAF-C3	NMD3
PARK7+CAF-C3	LAPTM4A
PARK7+CAF-C3	ARHGDIA
PARK7+CAF-C3	PLPP3
PARK7+CAF-C3	TNFRSF12A
PARK7+CAF-C3	TUBA1B
PARK7+CAF-C3	KCNS3
PARK7+CAF-C3	FYTTD1
PARK7+CAF-C3	VSNL1
PARK7+CAF-C3	OAZ2
PARK7+CAF-C3	CREB1
PARK7+CAF-C3	NMRAL1
PARK7+CAF-C3	MAP2K7
PARK7+CAF-C3	RSL1D1
PARK7+CAF-C3	H2AFJ
PARK7+CAF-C3	RNPEP
PARK7+CAF-C3	HSPA8
PARK7+CAF-C3	TSPAN6
PARK7+CAF-C3	PSMC2
PARK7+CAF-C3	RAB5C
PARK7+CAF-C3	CTSF
PARK7+CAF-C3	FBLN5
PARK7+CAF-C3	FKBP10
PARK7+CAF-C3	PCNP
PARK7+CAF-C3	AXL
PARK7+CAF-C3	GAPDH
PARK7+CAF-C3	ERH
PARK7+CAF-C3	RELA
PARK7+CAF-C3	AP2M1
PARK7+CAF-C3	E4F1
PARK7+CAF-C3	EIF4A3
PARK7+CAF-C3	AEBP2
PARK7+CAF-C3	LRPAP1
PARK7+CAF-C3	GRB2
PARK7+CAF-C3	DPM3
PARK7+CAF-C3	PSMD3
PARK7+CAF-C3	SEC13
PARK7+CAF-C3	NSMCE3
PARK7+CAF-C3	HSP90AB1
PARK7+CAF-C3	HPS5
PARK7+CAF-C3	TTC1
PARK7+CAF-C3	FIBIN
PARK7+CAF-C3	PPP1CB
PARK7+CAF-C3	SLC25A6
PARK7+CAF-C3	SLC41A3
PARK7+CAF-C3	TFG
PARK7+CAF-C3	DNASE2
PARK7+CAF-C3	NET1
PARK7+CAF-C3	TSC22D1
PARK7+CAF-C3	KDELR3
PARK7+CAF-C3	MT1E
PARK7+CAF-C3	GADD45B
PARK7+CAF-C3	RAB7A
PARK7+CAF-C3	NUCB2
PARK7+CAF-C3	SRSF2
PARK7+CAF-C3	NABP2
PARK7+CAF-C3	TRA2B
PARK7+CAF-C3	UBE2D3
PARK7+CAF-C3	CDKN2C
PARK7+CAF-C3	ATP6V1E1
PARK7+CAF-C3	NDN
PARK7+CAF-C3	GPKOW
PARK7+CAF-C3	TSPAN13
PARK7+CAF-C3	WDR83OS
PARK7+CAF-C3	TSPAN4
PARK7+CAF-C3	CHMP3
PARK7+CAF-C3	TUFM
PARK7+CAF-C3	NXT1
PARK7+CAF-C3	DPT
PARK7+CAF-C3	WNT5A
PARK7+CAF-C3	FHL1
PARK7+CAF-C3	ABHD14A
PARK7+CAF-C3	MXRA8
PARK7+CAF-C3	ERI3
PARK7+CAF-C3	CUTA
PARK7+CAF-C3	TPRA1
PARK7+CAF-C3	CNN3
VIM+CD8+T_cells-C1	VIM
VIM+CD8+T_cells-C1	NT5C3B
VIM+CD8+T_cells-C1	PCM1
VIM+CD8+T_cells-C1	MLLT6
VIM+CD8+T_cells-C1	IMMT
VIM+CD8+T_cells-C1	SELL
VIM+CD8+T_cells-C1	SLC9A3R1
VIM+CD8+T_cells-C1	TXNDC17
VIM+CD8+T_cells-C1	SERINC5
VIM+CD8+T_cells-C1	CEBPZ
VIM+CD8+T_cells-C1	EMC3
VIM+CD8+T_cells-C1	RBM26
VIM+CD8+T_cells-C1	PEPD
VIM+CD8+T_cells-C1	CD2
VIM+CD8+T_cells-C1	PCBP1
VIM+CD8+T_cells-C1	HLA-DQB1
VIM+CD8+T_cells-C1	LCP1
VIM+CD8+T_cells-C1	SPINK1
UBA52+CD8+T_cells-C2	UBA52
UBA52+CD8+T_cells-C2	SSBP1
UBA52+CD8+T_cells-C2	NSD1
UBA52+CD8+T_cells-C2	RETREG3
UBA52+CD8+T_cells-C2	RBX1
UBA52+CD8+T_cells-C2	GLUD1
UBA52+CD8+T_cells-C2	AURKAIP1
UBA52+CD8+T_cells-C2	PRKAA1
UBA52+CD8+T_cells-C2	RPL18
UBA52+CD8+T_cells-C2	SNRPG
UBA52+CD8+T_cells-C2	RPS15
UBA52+CD8+T_cells-C2	RPL27A
UBA52+CD8+T_cells-C2	UQCRFS1
UBA52+CD8+T_cells-C2	GNPAT
UBA52+CD8+T_cells-C2	IFI27L2
UBA52+CD8+T_cells-C2	ASPH
UBA52+CD8+T_cells-C2	DCTD
UBA52+CD8+T_cells-C2	RPS27A
UBA52+CD8+T_cells-C2	RPS7
UBA52+CD8+T_cells-C2	TUBB
UBA52+CD8+T_cells-C2	CCT4
UBA52+CD8+T_cells-C2	RPL26
UBA52+CD8+T_cells-C2	TSC22D1
UBA52+CD8+T_cells-C2	CCNC
UBA52+CD8+T_cells-C2	TALDO1
UBA52+CD8+T_cells-C2	NCKAP1L
UBA52+CD8+T_cells-C2	VOPP1
UBA52+CD8+T_cells-C2	MPC2
UBA52+CD8+T_cells-C2	DPY30
UBA52+CD8+T_cells-C2	ABHD17A
UBA52+CD8+T_cells-C2	POLR1D
UBA52+CD8+T_cells-C2	NKG7
UBA52+CD8+T_cells-C2	RPS8
UBA52+CD8+T_cells-C2	MINOS1
UBA52+CD8+T_cells-C2	LRCH4
UBA52+CD8+T_cells-C2	CORO1B
UBA52+CD8+T_cells-C2	IDI1
TUBA4A+CD8+T_cells-C3	TUBA4A
TUBA4A+CD8+T_cells-C3	TUBA1B
TUBA4A+CD8+T_cells-C3	RAB5B
TUBA4A+CD8+T_cells-C3	ZBTB24
TUBA4A+CD8+T_cells-C3	PIM2
TUBA4A+CD8+T_cells-C3	BEX3
TUBA4A+CD8+T_cells-C3	DRAM2
TUBA4A+CD8+T_cells-C3	PCNA
TUBA4A+CD8+T_cells-C3	RNF11
TUBA4A+CD8+T_cells-C3	RALGAPA1
TUBA4A+CD8+T_cells-C3	CCSER2
TUBA4A+CD8+T_cells-C3	IRF7
TUBA4A+CD8+T_cells-C3	DECR1
TUBA4A+CD8+T_cells-C3	DBI
TUBA4A+CD8+T_cells-C3	CAPZA2
TUBA4A+CD8+T_cells-C3	MT1X
TUBA4A+CD8+T_cells-C3	ANXA5
TUBA4A+CD8+T_cells-C3	SAR1B
TUBA4A+CD8+T_cells-C3	MDH2
TUBA4A+CD8+T_cells-C3	PTGER4
TUBA4A+CD8+T_cells-C3	COTL1
TUBA4A+CD8+T_cells-C3	ROCK1
TUBA4A+CD8+T_cells-C3	DDB2
TUBA4A+CD8+T_cells-C3	XPC
TUBA4A+CD8+T_cells-C3	RFFL
TUBA4A+CD8+T_cells-C3	TECR
TUBA4A+CD8+T_cells-C3	PPM1A
TUBA4A+CD8+T_cells-C3	BPGM
TUBA4A+CD8+T_cells-C3	HNRNPA0
TUBA4A+CD8+T_cells-C3	PPP1R12A
TUBA4A+CD8+T_cells-C3	KRT10
TUBA4A+CD8+T_cells-C3	ASCC2
TUBA4A+CD8+T_cells-C3	SF3B5
TUBA4A+CD8+T_cells-C3	METTL9
TUBA4A+CD8+T_cells-C3	RCAN3
TUBA4A+CD8+T_cells-C3	FBXO32
TUBA4A+CD8+T_cells-C3	PAN3
TUBA4A+CD8+T_cells-C3	VPS4B
TUBA4A+CD8+T_cells-C3	PRPF8
TUBA4A+CD8+T_cells-C3	TMEM123
TUBA4A+CD8+T_cells-C3	SSNA1
TUBA4A+CD8+T_cells-C3	AGPAT2
TUBA4A+CD8+T_cells-C3	DDOST
TUBA4A+CD8+T_cells-C3	SPARCL1
TUBA4A+CD8+T_cells-C3	PLS3
TUBA4A+CD8+T_cells-C3	CSAD
TUBA4A+CD8+T_cells-C3	DUSP23
TUBA1A+CD8+T_cells-C4	TUBA1A
TUBA1A+CD8+T_cells-C4	DYNLL1
TUBA1A+CD8+T_cells-C4	SDHAF3
TUBA1A+CD8+T_cells-C4	NOP53
TUBA1A+CD8+T_cells-C4	CACYBP
TUBA1A+CD8+T_cells-C4	BTN3A3
TUBA1A+CD8+T_cells-C4	MBD4
TUBA1A+CD8+T_cells-C4	KLHDC2
TUBA1A+CD8+T_cells-C4	ILF3-DT
TUBA1A+CD8+T_cells-C4	TSC22D3
TUBA1A+CD8+T_cells-C4	SNRPD3
TUBA1A+CD8+T_cells-C4	BZW1
TUBA1A+CD8+T_cells-C4	JUN
TUBA1A+CD8+T_cells-C4	CDKN1B
TUBA1A+CD8+T_cells-C4	GATA3
TUBA1A+CD8+T_cells-C4	AL662844.4
TUBA1A+CD8+T_cells-C4	ZFAND5
TUBA1A+CD8+T_cells-C4	DAZAP1
TUBA1A+CD8+T_cells-C4	MRPL54
TUBA1A+CD8+T_cells-C4	MIF
TUBA1A+CD8+T_cells-C4	NDUFV2
TUBA1A+CD8+T_cells-C4	NANS
TUBA1A+CD8+T_cells-C4	UHRF2
TUBA1A+CD8+T_cells-C4	RPS19BP1
VIM+Mac-C1	VIM
VIM+Mac-C1	MT-ND5
VIM+Mac-C1	MT-ND4
VIM+Mac-C1	MT-ATP6
VIM+Mac-C1	EEF2
VIM+Mac-C1	LYZ
VIM+Mac-C1	DSG2
VIM+Mac-C1	C11orf96
VIM+Mac-C1	TOX4
PARK7+Mac-C2	PARK7
PARK7+Mac-C2	DGCR6L
PARK7+Mac-C2	TSTD1
PARK7+Mac-C2	TMEM9
PARK7+Mac-C2	PSMA4
PARK7+Mac-C2	PSMB3
PARK7+Mac-C2	SMIM4
PARK7+Mac-C2	CFAP298
PARK7+Mac-C2	PSENEN
PARK7+Mac-C2	CMTM6
PARK7+Mac-C2	MCUR1
PARK7+Mac-C2	TUBA4A
PARK7+Mac-C2	FH
PARK7+Mac-C2	NARS2
PARK7+Mac-C2	CRTAP
PARK7+Mac-C2	DYNLL2
PARK7+Mac-C2	TMEM92
PARK7+Mac-C2	PPIE
PARK7+Mac-C2	PSMC4
PARK7+Mac-C2	NRGN
PARK7+Mac-C2	YWHAQ
PARK7+Mac-C2	SEMA4A
PARK7+Mac-C2	LSM4
PARK7+Mac-C2	QKI
PARK7+Mac-C2	SLC35C2
PARK7+Mac-C2	SMIM19
PARK7+Mac-C2	DNPH1
PARK7+Mac-C2	HIST1H1C
PARK7+Mac-C2	CALM2
PARK7+Mac-C2	SERINC3
PARK7+Mac-C2	NUCB2
PARK7+Mac-C2	GJA1
PARK7+Mac-C2	MTIF3
PARK7+Mac-C2	DESI2
PARK7+Mac-C2	NDUFB2
PARK7+Mac-C2	CDK4
PARK7+Mac-C2	CYC1
PARK7+Mac-C2	NDUFA4
PARK7+Mac-C2	UQCRB
PARK7+Mac-C2	GPRC5C
PARK7+Mac-C2	C21orf2
PARK7+Mac-C2	RAB11B
PARK7+Mac-C2	PLPP5
PARK7+Mac-C2	TIMM10B
PARK7+Mac-C2	MORN2
PARK7+Mac-C2	UBLCP1
PARK7+Mac-C2	TMEM129
PARK7+Mac-C2	RAN
PARK7+Mac-C2	EIF3F
PARK7+Mac-C2	TAOK3
PARK7+Mac-C2	RAP1A
PARK7+Mac-C2	HMGCL
PARK7+Mac-C2	ATXN2
PARK7+Mac-C2	EIF5A
PARK7+Mac-C2	HADHB
PARK7+Mac-C2	PFN1
PARK7+Mac-C2	HMOX1
PARK7+Mac-C2	MRPL42
PARK7+Mac-C2	CDK2AP2
PARK7+Mac-C2	MAGED1
PARK7+Mac-C2	P3H2
PARK7+Mac-C2	MLF2
PARK7+Mac-C2	ARPC3
PARK7+Mac-C2	PSMA5
PARK7+Mac-C2	HDDC2
PARK7+Mac-C2	NT5DC1
PARK7+Mac-C2	ADGRD1
PARK7+Mac-C2	CAPRIN1
PARK7+Mac-C2	MT1X
PARK7+Mac-C2	ENY2
PARK7+Mac-C2	ANXA7
PARK7+Mac-C2	ZNF593
PARK7+Mac-C2	HIP1R
PARK7+Mac-C2	MRPS26
PARK7+Mac-C2	MRPL52
PARK7+Mac-C2	CIB1
PARK7+Mac-C2	GCN1
PARK7+Mac-C2	SNF8
PARK7+Mac-C2	ME2
PARK7+Mac-C2	SELENOM
PARK7+Mac-C2	ST3GAL5
PARK7+Mac-C2	COX7A2
PARK7+Mac-C2	BLVRB
PARK7+Mac-C2	CTSD
PARK7+Mac-C2	IFT57
PARK7+Mac-C2	IGF2R
PARK7+Mac-C2	CHCHD2
PARK7+Mac-C2	UBE2S
PARK7+Mac-C2	CHMP7
PARK7+Mac-C2	PIGF
PARK7+Mac-C2	TRPT1
PARK7+Mac-C2	CGGBP1
PARK7+Mac-C2	FNIP1
PARK7+Mac-C2	ZNF511
PARK7+Mac-C2	PSMA2
PARK7+Mac-C2	MGLL
